# Supplementary material for: Spatial Patterns of Aflatoxin Levels in Relation to Ear-Feeding Insect Damage in Pre-Harvest Corn
Source: Toxins (Basel). 2011 Jul 21;3(7):920–31. doi: 10.3390/toxins3070920 (PMC3202857; doi:10.3390/toxins3070920)
Supplement: Supplementary File 1: — Table S1 (XLSX, 85 KB) [file toxins-03-00920-s001.xlsx]

## Sheet: 2006-insect-damage
Field	row	point	ear sample	weevil	husk	cewdamage	stinkbug	kernel-column	ker-row
Gibbs	0	1	1	0	1	1	11	20	37
Gibbs	0	1	2	0	1	1	2	20	37
Gibbs	0	1	3	0	1	1	0	20	37
Gibbs	0	1	4	0	1	1	0	20	37
Gibbs	0	1	5	0	1	1	4	20	37
Gibbs	0	2	1	0	1	1	2	16	34
Gibbs	0	2	2	0	1	1	40	16	34
Gibbs	0	2	3	0	1	1	0	16	34
Gibbs	0	2	4	0	0	1	0	16	34
Gibbs	0	2	5	0	1	1	1	16	34
Gibbs	0	3	1	0	1	1	0	16	38
Gibbs	0	3	2	0	1	1	5	16	38
Gibbs	0	3	3	0	1	1	0	16	38
Gibbs	0	3	4	0	1	1	0	16	38
Gibbs	0	3	5	0	1	1	0	16	38
Gibbs	0	4	1	0	1	1	0	16	38
Gibbs	0	4	2	0	1	1	0	16	38
Gibbs	0	4	3	0	1	1	0	16	38
Gibbs	0	4	4	0	1	1	0	16	38
Gibbs	0	4	5	0	1	1	0	16	38
Gibbs	0	5	1	0	1	1	0	16	37
Gibbs	0	5	2	1	1	1	0	16	37
Gibbs	0	5	3	3	1	1	0	16	37
Gibbs	0	5	4	0	1	1	0	16	37
Gibbs	0	5	5	0	1	1	2	16	37
Gibbs	0	6	1	0	1	1	0	14	27
Gibbs	0	6	2	0	1	1	0	14	27
Gibbs	0	6	3	0	1	1	0	14	27
Gibbs	0	6	4	0	1	1	0	14	27
Gibbs	0	6	5	0	1	1	0	14	27
Gibbs	0	7	1	0	1	1	0	16	32
Gibbs	0	7	2	0	1	1	0	16	32
Gibbs	0	7	3	0	1	1	0	16	32
Gibbs	0	7	4	0	1	1	0	16	32
Gibbs	0	7	5	0	1	1	0	16	32
Gibbs	0	8	1	0	1	1	0	16	38
Gibbs	0	8	2	0	1	1	1	16	38
Gibbs	0	8	3	0	1	1	1	16	38
Gibbs	0	8	4	0	1	1	0	16	38
Gibbs	0	8	5	0	0	1	0	16	38
Gibbs	0	9	1	0	1	1	0	14	31
Gibbs	0	9	2	0	1	1	0	14	31
Gibbs	0	9	3	0	1	1	0	14	31
Gibbs	0	9	4	0	1	1	0	14	31
Gibbs	0	9	5	0	1	1	5	14	31
Gibbs	0	10	1	0	1	1	0	16	34
Gibbs	0	10	2	0	1	1	0	16	34
Gibbs	0	10	3	0	0	1	0	16	34
Gibbs	0	10	4	0	1	1	0	16	34
Gibbs	0	10	5	0	1	1	0	16	34
Gibbs	0	11	1	0	1	1	0	16	34
Gibbs	0	11	2	0	1	1	0	14	23
Gibbs	0	11	3	0	1	1	0	14	23
Gibbs	0	11	4	0	1	1	0	14	23
Gibbs	0	11	5	0	1	1	0	14	23
Gibbs	0	12	1	0	1	1	0	18	43
Gibbs	0	12	2	0	1	1	0	18	43
Gibbs	0	12	3	0	0	1	0	18	43
Gibbs	0	12	4	0	0	1	0	18	43
Gibbs	0	12	5	0	1	1	0	18	43
Gibbs	0	13	1	0	1	1	0	16	31
Gibbs	0	13	2	0	1	1	0	16	31
Gibbs	0	13	3	0	0	1	0	16	31
Gibbs	0	13	4	0	1	1	0	16	31
Gibbs	0	13	5	0	0	1	0	16	31
Gibbs	0	14	1	0	0	1	0	14	34
Gibbs	0	14	2	0	1	1	0	14	34
Gibbs	0	14	3	0	1	1	0	14	34
Gibbs	0	14	4	0	1	1	0	14	34
Gibbs	0	14	5	0	0	1	0	14	34
Gibbs	0	15	1	0	1	1	0	16	38
Gibbs	0	15	2	0	1	1	0	16	38
Gibbs	0	15	3	0	1	1	3	16	38
Gibbs	0	15	4	0	1	1	0	16	38
Gibbs	0	15	5	0	1	1	18	16	38
Gibbs	0	16	1	0	1	1	12	16	29
Gibbs	0	16	2	1	1	1	0	16	29
Gibbs	0	16	3	0	1	0	16	16	29
Gibbs	0	16	4	0	1	1	5	16	29
Gibbs	0	16	5	0	1	1	13	16	29
Gibbs	0	17	1	0	1	1	5	16	25
Gibbs	0	17	2	0	1	1	0	16	25
Gibbs	0	17	3	0	1	1	3	16	25
Gibbs	0	17	4	0	1	1	0	16	25
Gibbs	0	17	5	0	1	1	0	16	25
Gibbs	1	1	1	0	1	0	29	16	40
Gibbs	1	1	2	0	1	1	3	16	40
Gibbs	1	1	3	0	1	1	8	16	40
Gibbs	1	1	4	0	0	1	4	16	40
Gibbs	1	1	5	0	1	1	0	16	40
Gibbs	1	2	1	0	0	1	0	18	41
Gibbs	1	2	2	0	1	1	6	18	41
Gibbs	1	2	3	0	1	1	1	18	41
Gibbs	1	2	4	0	1	1	0	18	41
Gibbs	1	2	5	0	1	1	0	18	41
Gibbs	1	3	1	0	0	1	1	14	39
Gibbs	1	3	2	0	1	1	0	14	39
Gibbs	1	3	3	0	1	1	5	14	39
Gibbs	1	3	4	0	1	0	0	14	39
Gibbs	1	3	5	0	1	1	0	18	24
Gibbs	1	4	1	0	1	0	0	18	24
Gibbs	1	4	2	0	0	1	0	18	24
Gibbs	1	4	3	0	1	1	0	18	24
Gibbs	1	4	4	0	1	1	0	18	24
Gibbs	1	4	5	0	1	1	0	18	24
Gibbs	1	5	1	0	1	1	0	16	38
Gibbs	1	5	2	0	0	1	0	16	38
Gibbs	1	5	3	0	1	0	0	16	38
Gibbs	1	5	4	0	0	1	0	16	38
Gibbs	1	5	5	0	0	1	0	16	38
Gibbs	1	6	1	0	0	1	0	14	35
Gibbs	1	6	2	0	1	1	7	14	35
Gibbs	1	6	3	0	1	1	0	14	35
Gibbs	1	6	4	0	1	1	8	14	35
Gibbs	1	6	5	0	1	1	0	14	35
Gibbs	1	7	1	0	1	1	3	18	41
Gibbs	1	7	2	0	1	1	1	18	41
Gibbs	1	7	3	0	1	1	0	18	41
Gibbs	1	7	4	0	0	1	0	18	41
Gibbs	1	7	5	0	0	1	0	18	41
Gibbs	1	8	1	0	1	1	8	18	36
Gibbs	1	8	2	0	1	1	0	18	36
Gibbs	1	8	3	0	0	1	0	18	36
Gibbs	1	8	4	0	0	1	1	18	36
Gibbs	1	8	5	0	0	1	1	18	36
Gibbs	1	9	1	0	1	1	0	20	36
Gibbs	1	9	2	0	1	1	0	20	36
Gibbs	1	9	3	0	0	1	0	20	36
Gibbs	1	9	4	0	0	1	0	20	36
Gibbs	1	9	5	0	0	1	0	20	36
Gibbs	1	10	1	0	1	1	0	16	42
Gibbs	1	10	2	0	1	1	0	16	42
Gibbs	1	10	3	0	1	1	0	16	42
Gibbs	1	10	4	0	1	1	0	16	42
Gibbs	1	10	5	0	1	1	2	16	42
Gibbs	1	11	1	0	1	1	0	16	41
Gibbs	1	11	2	0	1	1	1	16	41
Gibbs	1	11	3	0	1	1	0	16	41
Gibbs	1	11	4	0	1	1	0	16	41
Gibbs	1	11	5	0	1	1	0	16	41
Gibbs	1	12	1	0	0	1	4	18	36
Gibbs	1	12	2	0	1	1	0	18	36
Gibbs	1	12	3	0	1	1	0	18	36
Gibbs	1	12	4	0	1	1	0	18	36
Gibbs	1	12	5	0	1	1	0	18	36
Gibbs	1	13	1	0	1	1	0	18	42
Gibbs	1	13	2	0	0	1	5	18	42
Gibbs	1	13	3	0	0	1	0	18	42
Gibbs	1	13	4	0	1	1	0	18	42
Gibbs	1	13	5	0	0	1	0	18	42
Gibbs	1	14	1	0	0	0	0	14	35
Gibbs	1	14	2	0	1	1	6	14	35
Gibbs	1	14	3	0	0	1	0	14	35
Gibbs	1	14	4	0	1	0	0	14	35
Gibbs	1	14	5	0	1	0	9	14	35
Gibbs	1	15	1	1	1	1	23	16	45
Gibbs	1	15	2	0	1	1	1	16	45
Gibbs	1	15	3	0	1	1	0	16	45
Gibbs	1	15	4	2	0	1	3	16	45
Gibbs	1	15	5	0	1	1	0	16	45
Gibbs	1	16	1	0	1	1	0	14	33
Gibbs	1	16	2	0	1	1	0	14	33
Gibbs	1	16	3	0	1	0	5	14	33
Gibbs	1	16	4	0	1	0	0	14	33
Gibbs	1	16	5	3	0	1	0	14	33
Gibbs	1	17	1	0	1	1	0	16	25
Gibbs	1	17	2	0	1	1	25	16	25
Gibbs	1	17	3	0	1	1	0	16	25
Gibbs	1	17	4	0	1	1	2	16	25
Gibbs	1	17	5	0	1	1	17	16	25
Gibbs	2	1	1	0	1	1	14	16	30
Gibbs	2	1	2	0	1	1	2	16	30
Gibbs	2	1	3	0	1	1	0	16	30
Gibbs	2	1	4	0	1	1	4	16	30
Gibbs	2	1	5	0	0	1	0	16	30
Gibbs	2	2	1	0	1	1	0	18	44
Gibbs	2	2	2	0	1	1	0	18	44
Gibbs	2	2	3	0	1	1	0	18	44
Gibbs	2	2	4	0	1	1	0	18	44
Gibbs	2	2	5	0	1	1	8	18	44
Gibbs	2	3	1	0	1	1	0	16	40
Gibbs	2	3	2	0	1	1	0	16	40
Gibbs	2	3	3	0	1	1	0	16	40
Gibbs	2	3	4	0	1	1	0	16	40
Gibbs	2	3	5	0	0	1	0	16	40
Gibbs	2	4	1	0	0	0	0	16	39
Gibbs	2	4	2	0	1	1	0	16	39
Gibbs	2	4	3	0	1	0	0	16	39
Gibbs	2	4	4	0	1	1	0	16	39
Gibbs	2	4	5	0	1	1	0	16	39
Gibbs	2	5	1	0	1	1	0	16	37
Gibbs	2	5	2	0	1	1	8	16	37
Gibbs	2	5	3	0	1	1	0	16	37
Gibbs	2	5	4	0	1	1	0	16	37
Gibbs	2	5	5	0	1	1	0	16	37
Gibbs	2	6	1	0	1	1	0	18	33
Gibbs	2	6	2	0	1	1	0	18	33
Gibbs	2	6	3	0	1	1	0	18	33
Gibbs	2	6	4	0	0	1	0	18	33
Gibbs	2	6	5	0	0	1	0	18	33
Gibbs	2	7	1	0	0	1	0	16	40
Gibbs	2	7	2	0	1	1	9	16	40
Gibbs	2	7	3	0	1	1	2	16	40
Gibbs	2	7	4	0	1	1	0	16	40
Gibbs	2	7	5	0	1	1	0	16	40
Gibbs	2	8	1	0	0	1	0	16	42
Gibbs	2	8	2	0	0	1	2	16	42
Gibbs	2	8	3	0	1	1	0	16	42
Gibbs	2	8	4	0	1	1	0	16	42
Gibbs	2	8	5	0	1	1	1	16	42
Gibbs	2	9	1	0	1	1	1	16	34
Gibbs	2	9	2	0	1	1	0	16	34
Gibbs	2	9	3	0	1	1	0	16	34
Gibbs	2	9	4	0	0	1	1	16	34
Gibbs	2	9	5	0	0	1	3	16	34
Gibbs	2	10	1	0	0	1	0	16	41
Gibbs	2	10	2	0	1	0	0	16	41
Gibbs	2	10	3	0	1	1	0	16	41
Gibbs	2	10	4	0	1	1	0	16	41
Gibbs	2	10	5	0	1	1	0	16	41
Gibbs	2	11	1	0	1	1	0	16	35
Gibbs	2	11	2	0	1	1	0	16	35
Gibbs	2	11	3	0	1	1	0	16	35
Gibbs	2	11	4	0	1	1	0	16	35
Gibbs	2	11	5	0	0	1	0	16	35
Gibbs	2	12	1	0	0	1	0	18	41
Gibbs	2	12	2	0	1	1	0	18	41
Gibbs	2	12	3	0	1	1	0	18	41
Gibbs	2	12	4	0	1	1	0	18	41
Gibbs	2	12	5	0	1	1	0	18	41
Gibbs	2	13	1	1	1	1	0	18	44
Gibbs	2	13	2	0	1	1	0	18	44
Gibbs	2	13	3	0	1	1	0	18	44
Gibbs	2	13	4	0	1	1	0	18	44
Gibbs	2	13	5	6	1	1	2	18	44
Gibbs	2	14	1	0	1	1	0	18	41
Gibbs	2	14	2	0	1	1	5	18	41
Gibbs	2	14	3	2	1	1	1	18	41
Gibbs	2	14	4	4	0	1	0	18	41
Gibbs	2	14	5	4	0	1	0	18	41
Gibbs	3	1	1	0	0	1	0	18	42
Gibbs	3	1	2	0	1	1	0	18	42
Gibbs	3	1	3	0	1	1	2	18	42
Gibbs	3	1	4	0	1	1	4	18	42
Gibbs	3	1	5	0	1	1	0	18	42
Gibbs	3	2	1	0	1	1	0	16	36
Gibbs	3	2	2	0	0	1	0	16	36
Gibbs	3	2	3	0	0	1	0	16	36
Gibbs	3	2	4	0	0	1	0	16	36
Gibbs	3	2	5	0	0	1	0	16	36
Gibbs	3	3	1	0	0	1	2	18	36
Gibbs	3	3	2	0	1	1	0	18	36
Gibbs	3	3	3	0	1	1	0	18	36
Gibbs	3	3	4	0	1	1	0	18	36
Gibbs	3	3	5	0	1	1	0	18	36
Gibbs	3	4	1	0	1	1	0	16	37
Gibbs	3	4	2	0	1	1	0	16	37
Gibbs	3	4	3	0	1	1	0	16	37
Gibbs	3	4	4	0	1	1	0	16	37
Gibbs	3	4	5	0	0	1	0	16	37
Gibbs	3	5	1	0	0	1	6	18	39
Gibbs	3	5	2	0	0	1	0	18	39
Gibbs	3	5	3	0	1	1	0	18	39
Gibbs	3	5	4	0	1	1	0	18	39
Gibbs	3	5	5	0	1	1	1	18	39
Gibbs	3	6	1	0	1	1	0	16	36
Gibbs	3	6	2	0	1	1	0	16	36
Gibbs	3	6	3	0	1	1	0	16	36
Gibbs	3	6	4	0	0	1	4	16	36
Gibbs	3	6	5	0	0	1	0	16	36
Gibbs	3	7	1	0	0	1	0	14	40
Gibbs	3	7	2	0	0	1	0	14	40
Gibbs	3	7	3	0	1	1	0	14	40
Gibbs	3	7	4	0	1	1	0	14	40
Gibbs	3	7	5	0	1	1	0	14	40
Gibbs	3	8	1	2	1	1	0	14	40
Gibbs	3	8	2	0	1	1	0	14	40
Gibbs	3	8	3	0	1	1	0	14	40
Gibbs	3	8	4	0	1	1	0	14	40
Gibbs	3	8	5	1	0	1	0	14	40
Gibbs	3	9	1	0	0	1	0	18	40
Gibbs	3	9	2	0	0	1	15	18	40
Gibbs	3	9	3	0	1	1	1	18	40
Gibbs	3	9	4	5	1	1	0	18	40
Gibbs	3	9	5	0	1	1	0	18	40
Gibbs	3	10	1	0	1	0	0	18	36
Gibbs	3	10	2	0	1	1	0	18	36
Gibbs	3	10	3	0	1	1	0	18	36
Gibbs	3	10	4	0	1	1	0	18	36
Gibbs	3	10	5	0	0	1	0	18	36
Gibbs	3	11	1	0	0	1	0	16	42
Gibbs	3	11	2	0	1	1	0	16	42
Gibbs	3	11	3	0	1	1	0	16	42
Gibbs	3	11	4	0	1	1	0	16	42
Gibbs	3	11	5	0	1	1	0	16	42
Gibbs	3	12	1	0	1	1	2	16	42
Gibbs	3	12	2	0	1	1	0	16	42
Gibbs	3	12	3	0	1	1	0	16	42
Gibbs	3	12	4	0	0	1	0	16	42
Gibbs	3	12	5	0	0	1	0	16	42
Gibbs	3	13	1	0	0	1	0	18	39
Gibbs	3	13	2	0	0	1	0	18	39
Gibbs	3	13	3	0	0	1	0	18	39
Gibbs	3	13	4	0	1	1	0	18	39
Gibbs	3	13	5	1	1	1	2	18	39
Gibbs	3	14	1	0	1	1	9	22	36
Gibbs	3	14	2	0	1	1	1	22	36
Gibbs	3	14	3	0	1	1	30	22	36
Gibbs	3	14	4	3	1	1	0	22	36
Gibbs	3	14	5	0	0	1	4	22	36
Gibbs	4	1	1	0	0	1	0	14	32
Gibbs	4	1	2	0	1	1	18	14	32
Gibbs	4	1	3	0	1	1	14	14	32
Gibbs	4	1	4	0	1	1	0	14	32
Gibbs	4	1	5	0	1	0	12	14	32
Gibbs	4	2	1	0	1	1	0	16	30
Gibbs	4	2	2	0	1	1	7	16	30
Gibbs	4	2	3	0	1	1	2	16	30
Gibbs	4	2	4	0	1	0	0	16	30
Gibbs	4	2	5	0	1	1	12	16	30
Gibbs	4	3	1	0	1	1	0	16	32
Gibbs	4	3	2	0	1	1	0	16	32
Gibbs	4	3	3	0	1	0	0	16	32
Gibbs	4	3	4	0	1	1	15	16	32
Gibbs	4	3	5	0	1	0	0	16	32
Gibbs	4	4	1	6	1	1	0	16	32
Gibbs	4	4	2	3	1	1	0	16	32
Gibbs	4	4	3	0	1	1	0	16	32
Gibbs	4	4	4	0	1	1	0	16	32
Gibbs	4	4	5	0	1	1	0	16	32
Gibbs	4	5	1	2	1	0	0	14	36
Gibbs	4	5	2	1	1	1	5	14	36
Gibbs	4	5	3	0	1	1	2	14	36
Gibbs	4	5	4	0	1	1	0	14	36
Gibbs	4	5	5	0	1	1	0	14	36
Gibbs	4	6	1	1	1	1	2	14	39
Gibbs	4	6	2	0	1	1	0	14	39
Gibbs	4	6	3	0	1	1	0	14	39
Gibbs	4	6	4	3	1	1	1	14	39
Gibbs	4	6	5	0	0	1	0	14	39
Gibbs	4	7	1	0	1	1	0	16	32
Gibbs	4	7	2	1	1	1	0	16	32
Gibbs	4	7	3	0	1	1	0	16	32
Gibbs	4	7	4	0	1	1	0	16	32
Gibbs	4	7	5	0	1	1	0	16	32
Gibbs	4	8	1	0	1	1	0	18	25
Gibbs	4	8	2	5	1	1	0	18	25
Gibbs	4	8	3	0	0	1	22	18	25
Gibbs	4	8	4	0	0	1	0	18	25
Gibbs	4	8	5	0	0	1	16	18	25
Gibbs	4	9	1	0	1	1	0	16	41
Gibbs	4	9	2	0	1	1	0	16	41
Gibbs	4	9	3	0	1	1	1	16	41
Gibbs	4	9	4	1	1	1	0	16	41
Gibbs	4	9	5	4	1	1	0	16	41
Gibbs	4	10	1	0	1	1	1	18	38
Gibbs	4	10	2	0	1	1	0	18	38
Gibbs	4	10	3	3	1	1	0	18	38
Gibbs	4	10	4	2	1	1	26	18	38
Gibbs	4	10	5	9	0	1	4	18	38
Gibbs	4	11	1	0	0	1	0	14	36
Gibbs	4	11	2	0	1	1	0	14	36
Gibbs	4	11	3	0	1	1	0	14	36
Gibbs	4	11	4	0	1	1	0	14	36
Gibbs	4	11	5	0	1	1	0	14	36
Gibbs	4	12	1	0	1	1	0	16	32
Gibbs	4	12	2	0	1	1	1	16	32
Gibbs	4	12	3	0	1	1	1	16	32
Gibbs	4	12	4	0	0	1	0	16	32
Gibbs	4	12	5	0	0	1	0	16	32
Gibbs	4	13	1	0	1	1	0	16	26
Gibbs	4	13	2	0	1	0	0	16	26
Gibbs	4	13	3	0	1	0	4	16	26
Gibbs	4	13	4	0	1	1	0	16	26
Gibbs	4	13	5	3	1	1	0	16	26
Gibbs	4	14	1	7	1	1	0	18	30
Gibbs	4	14	2	3	1	1	3	18	30
Gibbs	4	14	3	0	1	1	0	18	30
Gibbs	4	14	4	4	0	1	0	18	30
Gibbs	4	14	5	4	0	1	0	18	30

## Sheet: 2006 aflatoxin
Gibbs Farm 2006 aflatoxin analysis results
row	point	aflatoxin (ppb)
0	1	63
0	2	49
0	3	25
0	4	18
0	5	44
0	6	27
0	7	22
0	8	16
0	9	13
0	10	11
0	11	15
0	12	10
0	13	120
0	14	11
0	15	19
0	16	70
0	17	9
1	1	9
1	2	12
1	3	9
1	4	9
1	5	20
1	6	44
1	7	18
1	8	16
1	9	25
1	10	12
1	11	10
1	12	14
1	13	11
1	14	21
1	15	10
1	16	32
1	17	64
2	1	93
2	2	18
2	3	13
2	4	10
2	5	17
2	6	8
2	7	10
2	8	16
2	9	7
2	10	12
2	11	41
2	12	20
2	13	7
2	14	96
3	1	17
3	2	55
3	3	14
3	4	9
3	5	13
3	6	18
3	7	12
3	8	9
3	9	10
3	10	10
3	11	10
3	12	8
3	13	14
3	14	12
4	1	16
4	2	15
4	3	12
4	4	10
4	5	35
4	6	7
4	7	23
4	8	92
4	9	24
4	10	110
4	11	7
4	12	26
4	13	17
4	14	88

## Sheet: 2007-insect-damage
Field	row	point	ear	weevil	husk	cewdamage	stinkb	kernel-column	ker-row
Belflower	0	1	1	0	0	0	38	14	40
Belflower	0	1	2	0	1	0	38	14	40
Belflower	0	1	3	0	1	0	38	14	40
Belflower	0	1	4	0	1	0	38	14	40
Belflower	0	1	5	0	1	0	38	14	40
Belflower	0	2	1	0	1	0	22	12	39
Belflower	0	2	2	0	1	1	22	12	39
Belflower	0	2	3	0	1	1	22	12	39
Belflower	0	2	4	0	1	0	22	12	39
Belflower	0	2	5	0	1	0	22	12	39
Belflower	0	3	1	0	0	0	5	14	31
Belflower	0	3	2	0	1	1	5	14	31
Belflower	0	3	3	0	0	0	5	14	31
Belflower	0	3	4	0	1	0	5	14	31
Belflower	0	3	5	0	1	1	5	14	31
Belflower	0	4	1	13	0	1	10	18	36
Belflower	0	4	2	18	1	1	10	18	36
Belflower	0	4	3	2	1	1	10	18	36
Belflower	0	4	4	6	0	1	10	18	36
Belflower	0	4	5	0	1	1	10	18	36
Belflower	0	5	1	13	1	1	14	16	35
Belflower	0	5	2	11	1	1	14	16	35
Belflower	0	5	3	11	0	1	14	16	35
Belflower	0	5	4	2	0	1	14	16	35
Belflower	0	5	5	20	1	1	14	16	35
Belflower	0	6	1	0	1	1	8	16	28
Belflower	0	6	2	0	1	1	8	16	28
Belflower	0	6	3	0	1	1	8	16	28
Belflower	0	6	4	0	0	0	8	16	28
Belflower	0	6	5	5	1	0	8	16	28
Belflower	0	7	1	11	1	1	23	16	43
Belflower	0	7	2	0	1	0	23	16	43
Belflower	0	7	3	0	1	0	23	16	43
Belflower	0	7	4	0	1	1	23	16	43
Belflower	0	7	5	0	1	1	23	16	43
Belflower	0	8	1	15	0	1	21	14	41
Belflower	0	8	2	3	0	0	21	14	41
Belflower	0	8	3	0	1	0	21	14	41
Belflower	0	8	4	8	1	1	21	14	41
Belflower	0	8	5	20	1	1	21	14	41
Belflower	0	9	1	40	1	1	150	18	41
Belflower	0	9	2	15	1	1	150	18	41
Belflower	0	9	3	10	1	1	150	18	41
Belflower	0	9	4	3	1	1	150	18	41
Belflower	0	9	5	3	1	0	150	18	41
Belflower	0	10	1	2	1	1	54	14	38
Belflower	0	10	2	10	1	1	54	14	38
Belflower	0	10	3	10	1	1	54	14	38
Belflower	0	10	4	3	1	0	54	14	38
Belflower	0	10	5	5	1	0	54	14	38
Belflower	0	11	1	6	1	1	41	14	44
Belflower	0	11	2	2	1	1	41	14	44
Belflower	0	11	3	10	1	1	41	14	44
Belflower	0	11	4	1	1	1	41	14	44
Belflower	0	11	5	15	1	1	41	14	44
Belflower	0	12	1	0	1	0	60	16	39
Belflower	0	12	2	2	0	1	60	16	39
Belflower	0	12	3	0	0	0	60	16	39
Belflower	0	12	4	5	1	1	60	16	39
Belflower	0	12	5	0	1	0	60	16	39
Belflower	0	13	1	0	1	0	62	14	39
Belflower	0	13	2	0	0	1	62	14	39
Belflower	0	13	3	0	0	0	62	14	39
Belflower	0	13	4	0	0	1	62	14	39
Belflower	0	13	5	0	0	1	62	14	39
Belflower	1	1	1	0	1	0	26	16	41
Belflower	1	1	2	0	0	0	26	16	41
Belflower	1	1	3	0	1	1	26	16	41
Belflower	1	1	4	0	1	1	26	16	41
Belflower	1	1	5	0	1	0	26	16	41
Belflower	1	2	1	0	1	0	0	14	39
Belflower	1	2	2	0	1	0	0	14	39
Belflower	1	2	3	0	1	0	0	14	39
Belflower	1	2	4	0	1	0	0	14	39
Belflower	1	2	5	0	0	0	0	14	39
Belflower	1	3	1	0	1	1	6	14	42
Belflower	1	3	2	2	1	1	6	14	42
Belflower	1	3	3	0	1	0	6	14	42
Belflower	1	3	4	0	0	0	6	14	42
Belflower	1	3	5	0	1	0	6	14	42
Belflower	1	4	1	0	1	0	3	16	32
Belflower	1	4	2	0	1	0	3	16	32
Belflower	1	4	3	0	1	0	3	16	32
Belflower	1	4	4	0	1	0	3	16	32
Belflower	1	4	5	0	1	0	3	16	32
Belflower	1	5	1	0	1	0	4	16	36
Belflower	1	5	2	0	0	1	4	16	36
Belflower	1	5	3	0	1	0	4	16	36
Belflower	1	5	4	0	1	0	4	16	36
Belflower	1	5	5	0	1	0	4	16	36
Belflower	1	6	1	0	1	1	15	14	38
Belflower	1	6	2	0	1	0	15	14	38
Belflower	1	6	3	0	1	0	15	14	38
Belflower	1	6	4	0	1	0	15	14	38
Belflower	1	6	5	0	1	0	15	14	38
Belflower	1	7	1	0	1	0	13	16	60
Belflower	1	7	2	0	1	0	13	16	60
Belflower	1	7	3	0	1	0	13	16	60
Belflower	1	7	4	0	1	1	13	16	60
Belflower	1	7	5	0	1	0	13	16	60
Belflower	1	8	1	0	0	0	2	16	40
Belflower	1	8	2	0	1	0	2	16	40
Belflower	1	8	3	0	1	0	2	16	40
Belflower	1	8	4	0	1	0	2	16	40
Belflower	1	8	5	0	1	0	2	16	40
Belflower	1	9	1	0	1	0	1	14	42
Belflower	1	9	2	0	1	0	1	14	42
Belflower	1	9	3	0	1	0	1	14	42
Belflower	1	9	4	0	1	0	1	14	42
Belflower	1	9	5	0	0	0	1	14	42
Belflower	1	10	1	0	0	1	19	18	41
Belflower	1	10	2	0	1	0	19	18	41
Belflower	1	10	3	0	1	0	19	18	41
Belflower	1	10	4	0	1	0	19	18	41
Belflower	1	10	5	0	1	0	19	18	41
Belflower	1	11	1	0	1	0	1	16	36
Belflower	1	11	2	0	1	0	1	16	36
Belflower	1	11	3	0	0	0	1	16	36
Belflower	1	11	4	0	1	0	1	16	36
Belflower	1	11	5	0	0	0	1	16	36
Belflower	1	12	1	0	1	0	24	14	38
Belflower	1	12	2	0	1	0	24	14	38
Belflower	1	12	3	0	1	0	24	14	38
Belflower	1	12	4	0	1	0	24	14	38
Belflower	1	12	5	0	1	0	24	14	38
Belflower	1	13	1	0	1	1	46	14	25
Belflower	1	13	2	0	1	1	46	14	25
Belflower	1	13	3	0	0	1	46	14	25
Belflower	1	13	4	1	1	1	46	14	25
Belflower	1	13	5	15	1	1	46	14	25
Belflower	2	1	1	0	1	0	1	16	40
Belflower	2	1	2	0	1	1	1	16	40
Belflower	2	1	3	0	1	0	1	16	40
Belflower	2	1	4	0	1	0	1	16	40
Belflower	2	1	5	0	1	0	1	16	40
Belflower	2	2	1	0	1	1	10	14	39
Belflower	2	2	2	0	1	0	10	14	39
Belflower	2	2	3	0	1	0	10	14	39
Belflower	2	2	4	0	1	0	10	14	39
Belflower	2	2	5	0	1	1	10	14	39
Belflower	2	3	1	0	1	1	4	14	43
Belflower	2	3	2	0	1	1	4	14	43
Belflower	2	3	3	0	1	1	4	14	43
Belflower	2	3	4	0	1	1	4	14	43
Belflower	2	3	5	0	1	1	4	14	43
Belflower	2	4	1	0	1	0	0	14	45
Belflower	2	4	2	0	1	0	0	14	45
Belflower	2	4	3	0	1	1	0	14	45
Belflower	2	4	4	0	1	0	0	14	45
Belflower	2	4	5	0	1	0	0	14	45
Belflower	2	5	1	0	1	1	0	16	38
Belflower	2	5	2	0	1	0	0	16	38
Belflower	2	5	3	0	1	1	0	16	38
Belflower	2	5	4	0	1	0	0	16	38
Belflower	2	5	5	0	1	0	0	16	38
Belflower	2	6	1	0	1	0	6	14	45
Belflower	2	6	2	0	1	0	6	14	45
Belflower	2	6	3	0	1	0	6	14	45
Belflower	2	6	4	0	1	1	6	14	45
Belflower	2	6	5	0	1	1	6	14	45
Belflower	2	7	1	0	1	0	30	14	47
Belflower	2	7	2	0	1	1	30	14	47
Belflower	2	7	3	0	1	1	30	14	47
Belflower	2	7	4	0	1	0	30	14	47
Belflower	2	7	5	0	1	0	30	14	47
Belflower	2	8	1	0	1	1	17	16	47
Belflower	2	8	2	2	1	0	17	16	47
Belflower	2	8	3	0	1	1	17	16	47
Belflower	2	8	4	1	1	0	17	16	47
Belflower	2	8	5	4	0	1	17	16	47
Belflower	2	9	1	0	1	1	2	14	42
Belflower	2	9	2	0	1	0	2	14	42
Belflower	2	9	3	0	1	0	2	14	42
Belflower	2	9	4	0	1	0	2	14	42
Belflower	2	9	5	0	1	0	2	14	42
Belflower	2	10	1	0	1	1	5	16	30
Belflower	2	10	2	0	1	1	5	16	30
Belflower	2	10	3	0	1	0	5	16	30
Belflower	2	10	4	0	1	0	5	16	30
Belflower	2	10	5	0	1	0	5	16	30
Belflower	2	11	1	0	1	0	0	14	31
Belflower	2	11	2	0	1	0	0	14	31
Belflower	2	11	3	0	1	0	0	14	31
Belflower	2	11	4	0	0	0	0	14	31
Belflower	2	11	5	0	1	0	0	14	31
Belflower	2	12	1	0	1	0	7	16	35
Belflower	2	12	2	0	1	1	7	16	35
Belflower	2	12	3	0	1	1	7	16	35
Belflower	2	12	4	0	1	1	7	16	35
Belflower	2	12	5	0	1	0	7	16	35
Belflower	2	13	1	0	1	0	42	14	43
Belflower	2	13	2	0	1	0	42	14	43
Belflower	2	13	3	0	1	1	42	14	43
Belflower	2	13	4	0	1	0	42	14	43
Belflower	2	13	5	0	1	1	42	14	43
Belflower	3	1	1	0	1	0	7	16	34
Belflower	3	1	2	0	1	0	7	16	34
Belflower	3	1	3	0	1	0	7	16	34
Belflower	3	1	4	0	1	0	7	16	34
Belflower	3	1	5	0	1	1	7	16	34
Belflower	3	2	1	0	1	1	17	18	44
Belflower	3	2	2	0	0	1	17	18	44
Belflower	3	2	3	0	0	0	17	18	44
Belflower	3	2	4	0	1	1	17	18	44
Belflower	3	2	5	2	1	0	17	18	44
Belflower	3	3	1	0	1	1	12	18	38
Belflower	3	3	2	6	1	0	12	18	38
Belflower	3	3	3	0	1	1	12	18	38
Belflower	3	3	4	1	1	0	12	18	38
Belflower	3	3	5	3	0	0	12	18	38
Belflower	3	4	1	0	1	0	8	14	37
Belflower	3	4	2	0	1	0	8	14	37
Belflower	3	4	3	0	1	0	8	14	37
Belflower	3	4	4	0	1	1	8	14	37
Belflower	3	4	5	0	1	1	8	14	37
Belflower	3	5	1	0	0	0	2	14	38
Belflower	3	5	2	0	1	0	2	14	38
Belflower	3	5	3	0	1	0	2	14	38
Belflower	3	5	4	0	1	0	2	14	38
Belflower	3	5	5	0	1	0	2	14	38
Belflower	3	6	1	0	1	0	1	16	37
Belflower	3	6	2	0	1	1	1	16	37
Belflower	3	6	3	0	1	1	1	16	37
Belflower	3	6	4	0	1	0	1	16	37
Belflower	3	6	5	0	1	1	1	16	37
Belflower	3	7	1	0	1	1	16	18	41
Belflower	3	7	2	0	1	0	16	18	41
Belflower	3	7	3	0	1	1	16	18	41
Belflower	3	7	4	0	1	0	16	18	41
Belflower	3	7	5	0	1	1	16	18	41
Belflower	3	8	1	0	1	0	1	14	37
Belflower	3	8	2	0	0	0	1	14	37
Belflower	3	8	3	0	1	1	1	14	37
Belflower	3	8	4	0	1	1	1	14	37
Belflower	3	8	5	0	1	1	1	14	37
Belflower	3	9	1	0	1	0	21	14	33
Belflower	3	9	2	0	1	0	21	14	33
Belflower	3	9	3	0	1	1	21	14	33
Belflower	3	9	4	0	1	0	21	14	33
Belflower	3	9	5	0	1	1	21	14	33
Belflower	3	10	1	0	1	0	9	16	43
Belflower	3	10	2	0	0	1	9	16	43
Belflower	3	10	3	0	1	1	9	16	43
Belflower	3	10	4	0	1	1	9	16	43
Belflower	3	10	5	0	0	1	9	16	43
Belflower	3	11	1	0	1	1	4	14	42
Belflower	3	11	2	0	1	1	4	14	42
Belflower	3	11	3	0	1	1	4	14	42
Belflower	3	11	4	0	1	1	4	14	42
Belflower	3	11	5	0	1	1	4	14	42
Belflower	3	12	1	0	1	0	12	14	41
Belflower	3	12	2	0	0	1	12	14	41
Belflower	3	12	3	0	1	1	12	14	41
Belflower	3	12	4	0	1	1	12	14	41
Belflower	3	12	5	0	1	0	12	14	41
Belflower	3	13	1	0	0	0	28	12	34
Belflower	3	13	2	0	1	1	28	12	34
Belflower	3	13	3	0	0	1	28	12	34
Belflower	3	13	4	0	1	0	28	12	34
Belflower	3	13	5	0	1	1	28	12	34
Belflower	4	1	1	0	1	1	0	16	34
Belflower	4	1	2	0	1	1	0	16	34
Belflower	4	1	3	0	1	0	0	16	34
Belflower	4	1	4	0	1	0	0	16	34
Belflower	4	1	5	0	1	0	0	16	34
Belflower	4	2	1	0	1	0	8	16	30
Belflower	4	2	2	0	1	1	8	16	30
Belflower	4	2	3	0	1	1	8	16	30
Belflower	4	2	4	0	1	0	8	16	30
Belflower	4	2	5	0	1	0	8	16	30
Belflower	4	3	1	0	1	0	0	14	33
Belflower	4	3	2	0	1	0	0	14	33
Belflower	4	3	3	0	1	1	0	14	33
Belflower	4	3	4	0	1	0	0	14	33
Belflower	4	3	5	0	1	0	0	14	33
Belflower	4	4	1	0	1	0	2	14	38
Belflower	4	4	2	0	1	0	2	14	38
Belflower	4	4	3	0	1	1	2	14	38
Belflower	4	4	4	0	1	0	2	14	38
Belflower	4	4	5	0	1	0	2	14	38
Belflower	4	5	1	0	1	0	7	14	30
Belflower	4	5	2	0	1	0	7	14	30
Belflower	4	5	3	0	1	0	7	14	30
Belflower	4	5	4	0	1	0	7	14	30
Belflower	4	5	5	0	1	0	7	14	30
Belflower	4	6	1	0	1	1	19	18	35
Belflower	4	6	2	0	1	1	19	18	35
Belflower	4	6	3	0	0	1	19	18	35
Belflower	4	6	4	0	1	0	19	18	35
Belflower	4	6	5	0	0	1	19	18	35
Belflower	4	7	1	0	1	1	4	16	43
Belflower	4	7	2	0	1	1	4	16	43
Belflower	4	7	3	0	1	1	4	16	43
Belflower	4	7	4	0	1	0	4	16	43
Belflower	4	7	5	0	0	0	4	16	43
Belflower	4	8	1	0	0	0	13	16	38
Belflower	4	8	2	0	1	0	13	16	38
Belflower	4	8	3	0	1	1	13	16	38
Belflower	4	8	4	0	1	0	13	16	38
Belflower	4	8	5	0	1	1	13	16	38
Belflower	4	9	1	0	1	1	13	14	32
Belflower	4	9	2	0	1	0	13	14	32
Belflower	4	9	3	0	1	0	13	14	32
Belflower	4	9	4	0	1	0	13	14	32
Belflower	4	9	5	0	1	0	13	14	32
Belflower	4	10	1	0	1	1	14	18	39
Belflower	4	10	2	0	1	0	14	18	39
Belflower	4	10	3	0	1	0	14	18	39
Belflower	4	10	4	0	1	0	14	18	39
Belflower	4	10	5	0	1	0	14	18	39
Belflower	4	11	1	0	0	0	4	16	36
Belflower	4	11	2	0	1	1	4	16	36
Belflower	4	11	3	0	1	0	4	16	36
Belflower	4	11	4	0	1	1	4	16	36
Belflower	4	11	5	0	1	1	4	16	36
Belflower	4	12	1	0	1	1	5	16	38
Belflower	4	12	2	0	1	1	5	16	38
Belflower	4	12	3	0	1	0	5	16	38
Belflower	4	12	4	0	1	0	5	16	38
Belflower	4	12	5	0	1	1	5	16	38
Belflower	4	13	1	0	1	0	2	14	40
Belflower	4	13	2	0	1	0	2	14	40
Belflower	4	13	3	0	0	0	2	14	40
Belflower	4	13	4	0	1	0	2	14	40
Belflower	4	13	5	0	1	1	2	14	40
Belflower	5	1	1	0	1	0	3	16	40
Belflower	5	1	2	0	1	1	3	16	40
Belflower	5	1	3	0	1	1	3	16	40
Belflower	5	1	4	0	1	0	3	16	40
Belflower	5	1	5	0	0	1	3	16	40
Belflower	5	2	1	0	1	1	7	16	35
Belflower	5	2	2	0	1	0	7	16	35
Belflower	5	2	3	0	1	0	7	16	35
Belflower	5	2	4	0	1	1	7	16	35
Belflower	5	2	5	0	1	1	7	16	35
Belflower	5	3	1	0	1	1	18	14	31
Belflower	5	3	2	0	1	0	18	14	31
Belflower	5	3	3	0	1	1	18	14	31
Belflower	5	3	4	0	1	1	18	14	31
Belflower	5	3	5	0	1	1	18	14	31
Belflower	5	4	1	3	1	1	14	16	39
Belflower	5	4	2	0	0	1	14	16	39
Belflower	5	4	3	0	1	0	14	16	39
Belflower	5	4	4	2	1	1	14	16	39
Belflower	5	4	5	1	1	1	14	16	39
Belflower	5	5	1	0	1	1	15	16	37
Belflower	5	5	2	0	1	1	15	16	37
Belflower	5	5	3	0	1	1	15	16	37
Belflower	5	5	4	0	1	1	15	16	37
Belflower	5	5	5	0	1	1	15	16	37
Belflower	5	6	1	0	1	0	0	16	37
Belflower	5	6	2	0	1	1	0	16	37
Belflower	5	6	3	0	1	0	0	16	37
Belflower	5	6	4	0	1	1	0	16	37
Belflower	5	6	5	0	1	0	0	16	37
Belflower	5	7	1	0	1	0	0	12	30
Belflower	5	7	2	0	1	0	0	12	30
Belflower	5	7	3	0	1	1	0	12	30
Belflower	5	7	4	0	1	0	0	12	30
Belflower	5	7	5	0	1	1	0	12	30
Belflower	5	8	1	0	1	0	0	12	45
Belflower	5	8	2	0	1	1	0	12	45
Belflower	5	8	3	0	1	0	0	12	45
Belflower	5	8	4	0	1	0	0	12	45
Belflower	5	8	5	0	1	0	0	12	45
Belflower	5	9	1	0	1	1	3	16	39
Belflower	5	9	2	0	1	1	3	16	39
Belflower	5	9	3	0	1	1	3	16	39
Belflower	5	9	4	0	1	0	3	16	39
Belflower	5	9	5	0	1	0	3	16	39
Belflower	5	10	1	0	1	0	0	16	41
Belflower	5	10	2	0	1	0	0	16	41
Belflower	5	10	3	0	1	0	0	16	41
Belflower	5	10	4	0	1	0	0	16	41
Belflower	5	10	5	0	1	0	0	16	41
Belflower	5	11	1	0	1	0	7	14	37
Belflower	5	11	2	0	1	1	7	14	37
Belflower	5	11	3	0	1	0	7	14	37
Belflower	5	11	4	0	1	0	7	14	37
Belflower	5	11	5	0	1	0	7	14	37
Belflower	5	12	1	0	1	0	17	16	34
Belflower	5	12	2	0	1	0	17	16	34
Belflower	5	12	3	0	1	0	17	16	34
Belflower	5	12	4	0	1	0	17	16	34
Belflower	5	12	5	0	1	0	17	16	34
Belflower	5	13	1	0	1	0	15	14	31
Belflower	5	13	2	0	1	0	15	14	31
Belflower	5	13	3	0	0	0	15	14	31
Belflower	5	13	4	0	1	1	15	14	31
Belflower	5	13	5	0	1	0	15	14	31
Belflower	6	1	1	0	1	1	11	14	34
Belflower	6	1	2	0	0	1	11	14	34
Belflower	6	1	3	0	1	0	11	14	34
Belflower	6	1	4	0	1	1	11	14	34
Belflower	6	1	5	0	1	0	11	14	34
Belflower	6	2	1	0	1	1	26	14	40
Belflower	6	2	2	0	1	0	26	14	40
Belflower	6	2	3	0	1	0	26	14	40
Belflower	6	2	4	3	1	1	26	14	40
Belflower	6	2	5	0	1	0	26	14	40
Belflower	6	3	1	0	1	0	11	14	41
Belflower	6	3	2	0	1	1	11	14	41
Belflower	6	3	3	0	1	1	11	14	41
Belflower	6	3	4	0	1	0	11	14	41
Belflower	6	3	5	0	0	0	11	14	41
Belflower	6	4	1	10	1	0	10	16	38
Belflower	6	4	2	5	1	0	10	16	38
Belflower	6	4	3	0	1	1	10	16	38
Belflower	6	4	4	0	1	1	10	16	38
Belflower	6	4	5	3	1	1	10	16	38
Belflower	6	5	1	0	1	0	16	18	41
Belflower	6	5	2	0	1	0	16	18	41
Belflower	6	5	3	0	1	1	16	18	41
Belflower	6	5	4	0	1	1	16	18	41
Belflower	6	5	5	0	1	0	16	18	41
Belflower	6	6	1	0	1	0	41	16	40
Belflower	6	6	2	0	1	1	41	16	40
Belflower	6	6	3	0	1	0	41	16	40
Belflower	6	6	4	0	0	0	41	16	40
Belflower	6	6	5	0	1	0	41	16	40
Belflower	6	7	1	0	1	1	13	14	29
Belflower	6	7	2	0	1	0	13	14	29
Belflower	6	7	3	0	1	1	13	14	29
Belflower	6	7	4	0	1	0	13	14	29
Belflower	6	7	5	0	1	1	13	14	29
Belflower	6	8	1	0	1	0	8	16	34
Belflower	6	8	2	0	1	0	8	16	34
Belflower	6	8	3	0	1	1	8	16	34
Belflower	6	8	4	0	1	0	8	16	34
Belflower	6	8	5	0	1	1	8	16	34
Belflower	6	9	1	0	1	0	42	16	41
Belflower	6	9	2	0	0	0	42	16	41
Belflower	6	9	3	0	1	1	42	16	41
Belflower	6	9	4	0	1	0	42	16	41
Belflower	6	9	5	0	0	0	42	16	41
Belflower	6	10	1	0	1	1	72	14	37
Belflower	6	10	2	0	0	1	72	14	37
Belflower	6	10	3	0	1	0	72	14	37
Belflower	6	10	4	0	1	1	72	14	37
Belflower	6	10	5	0	1	1	72	14	37
Belflower	6	11	1	0	1	0	57	16	43
Belflower	6	11	2	0	1	0	57	16	43
Belflower	6	11	3	2	1	0	57	16	43
Belflower	6	11	4	0	1	0	57	16	43
Belflower	6	11	5	0	1	0	57	16	43
Belflower	6	12	1	7	1	1	3	14	42
Belflower	6	12	2	0	1	0	3	14	42
Belflower	6	12	3	0	1	1	3	14	42
Belflower	6	12	4	0	1	0	3	14	42
Belflower	6	12	5	0	0	1	3	14	42
Belflower	6	13	1	0	1	1	0	14	32
Belflower	6	13	2	0	1	1	0	14	32
Belflower	6	13	3	0	1	0	0	14	32
Belflower	6	13	4	0	1	1	0	14	32
Belflower	6	13	5	0	1	0	0	14	32
Gibbs	0	1	1	0	0	0	120	14	33
Gibbs	0	1	2	0	1	0	120	14	33
Gibbs	0	1	3	0	1	1	120	14	33
Gibbs	0	1	4	0	1	0	120	14	33
Gibbs	0	1	5	0	1	0	120	14	33
Gibbs	0	2	1	0	0	1	120	14	33
Gibbs	0	2	2	0	1	1	120	14	33
Gibbs	0	2	3	0	1	0	120	14	33
Gibbs	0	2	4	0	1	0	120	14	33
Gibbs	0	2	5	0	1	1	120	14	33
Gibbs	0	3	1	0	1	0	0	14	42
Gibbs	0	3	2	0	1	1	0	14	42
Gibbs	0	3	3	2	1	1	0	14	42
Gibbs	0	3	4	0	0	1	0	14	42
Gibbs	0	3	5	3	1	0	0	14	42
Gibbs	0	4	1	0	1	0	22	12	34
Gibbs	0	4	2	0	1	0	22	12	34
Gibbs	0	4	3	0	1	0	22	12	34
Gibbs	0	4	4	0	1	0	22	12	34
Gibbs	0	4	5	0	1	0	22	12	34
Gibbs	0	5	1	0	0	0	78	14	41
Gibbs	0	5	2	0	1	0	78	14	41
Gibbs	0	5	3	0	1	0	78	14	41
Gibbs	0	5	4	0	1	0	78	14	41
Gibbs	0	5	5	0	1	0	78	14	41
Gibbs	0	6	1	0	1	0	38	14	33
Gibbs	0	6	2	0	1	0	38	14	33
Gibbs	0	6	3	0	1	1	38	14	33
Gibbs	0	6	4	0	1	0	38	14	33
Gibbs	0	6	5	0	1	0	38	14	33
Gibbs	0	7	1	0	1	0	12	16	31
Gibbs	0	7	2	3	1	0	12	16	31
Gibbs	0	7	3	0	1	0	12	16	31
Gibbs	0	7	4	0	1	0	12	16	31
Gibbs	0	7	5	0	1	0	12	16	31
Gibbs	0	8	1	0	1	0	55	14	43
Gibbs	0	8	2	0	1	0	55	14	43
Gibbs	0	8	3	0	1	0	55	14	43
Gibbs	0	8	4	0	1	0	55	14	43
Gibbs	0	8	5	0	1	0	55	14	43
Gibbs	0	9	1	0	1	0	90	16	43
Gibbs	0	9	2	0	1	0	90	16	43
Gibbs	0	9	3	0	1	0	90	16	43
Gibbs	0	9	4	0	1	0	90	16	43
Gibbs	0	9	5	0	1	0	90	16	43
Gibbs	0	10	1	0	1	0	92	16	41
Gibbs	0	10	2	0	1	0	92	16	41
Gibbs	0	10	3	0	1	1	92	16	41
Gibbs	0	10	4	0	0	1	92	16	41
Gibbs	0	10	5	0	1	1	92	16	41
Gibbs	0	11	1	0	0	0	5	16	39
Gibbs	0	11	2	0	1	0	5	16	39
Gibbs	0	11	3	0	1	0	5	16	39
Gibbs	0	11	4	0	1	0	5	16	39
Gibbs	0	11	5	0	1	0	5	16	39
Gibbs	0	12	1	0	1	1	18	14	39
Gibbs	0	12	2	0	1	1	18	14	39
Gibbs	0	12	3	0	1	1	18	14	39
Gibbs	0	12	4	0	1	1	18	14	39
Gibbs	0	12	5	0	1	0	18	14	39
Gibbs	0	13	1	0	1	1	15	16	31
Gibbs	0	13	2	0	1	1	15	16	31
Gibbs	0	13	3	0	1	0	15	16	31
Gibbs	0	13	4	0	1	0	15	16	31
Gibbs	0	13	5	0	1	0	15	16	31
Gibbs	0	14	1	0	1	1	78	14	37
Gibbs	0	14	2	0	1	1	78	14	37
Gibbs	0	14	3	0	1	1	78	14	37
Gibbs	0	14	4	0	1	1	78	14	37
Gibbs	0	14	5	0	1	1	78	14	37
Gibbs	0	15	1	0	1	0	31	12	38
Gibbs	0	15	2	0	1	1	31	12	38
Gibbs	0	15	3	0	1	0	31	12	38
Gibbs	0	15	4	0	1	1	31	12	38
Gibbs	0	15	5	0	1	1	31	12	38
Gibbs	0	16	1	0	1	1	28	12	43
Gibbs	0	16	2	0	1	0	28	12	43
Gibbs	0	16	3	0	1	1	28	12	43
Gibbs	0	16	4	0	1	0	28	12	43
Gibbs	0	16	5	0	1	0	28	12	43
Gibbs	0	17	1	0	1	1	93	12	29
Gibbs	0	17	2	0	1	1	93	12	29
Gibbs	0	17	3	0	1	1	93	12	29
Gibbs	0	17	4	0	0	1	93	12	29
Gibbs	0	17	5	0	1	1	93	12	29
Gibbs	1	1	1	0	1	1	20	12	45
Gibbs	1	1	2	0	1	0	20	12	45
Gibbs	1	1	3	0	1	1	20	12	45
Gibbs	1	1	4	0	1	0	20	12	45
Gibbs	1	1	5	0	1	1	20	12	45
Gibbs	1	2	1	0	0	1	6	14	38
Gibbs	1	2	2	0	1	0	6	14	38
Gibbs	1	2	3	0	1	0	6	14	38
Gibbs	1	2	4	0	1	1	6	14	38
Gibbs	1	2	5	0	1	0	6	14	38
Gibbs	1	3	1	0	1	0	28	14	39
Gibbs	1	3	2	0	1	0	28	14	39
Gibbs	1	3	3	0	1	0	28	14	39
Gibbs	1	3	4	0	1	1	28	14	39
Gibbs	1	3	5	0	1	0	28	14	39
Gibbs	1	4	1	0	1	0	18	14	41
Gibbs	1	4	2	0	1	0	18	14	41
Gibbs	1	4	3	0	1	1	18	14	41
Gibbs	1	4	4	0	1	0	18	14	41
Gibbs	1	4	5	0	1	0	18	14	41
Gibbs	1	5	1	0	1	1	9	16	43
Gibbs	1	5	2	0	1	0	9	16	43
Gibbs	1	5	3	0	1	0	9	16	43
Gibbs	1	5	4	0	1	0	9	16	43
Gibbs	1	5	5	0	1	1	9	16	43
Gibbs	1	6	1	0	1	0	0	16	39
Gibbs	1	6	2	0	1	0	0	16	39
Gibbs	1	6	3	0	1	1	0	16	39
Gibbs	1	6	4	0	1	0	0	16	39
Gibbs	1	6	5	0	1	0	0	16	39
Gibbs	1	7	1	0	1	0	42	16	41
Gibbs	1	7	2	0	1	1	42	16	41
Gibbs	1	7	3	0	1	1	42	16	41
Gibbs	1	7	4	0	1	1	42	16	41
Gibbs	1	7	5	0	1	1	42	16	41
Gibbs	1	8	1	0	1	1	10	16	34
Gibbs	1	8	2	0	1	0	10	16	34
Gibbs	1	8	3	0	1	0	10	16	34
Gibbs	1	8	4	0	1	0	10	16	34
Gibbs	1	8	5	0	1	1	10	16	34
Gibbs	1	9	1	0	1	1	27	14	46
Gibbs	1	9	2	0	1	0	27	14	46
Gibbs	1	9	3	0	1	0	27	14	46
Gibbs	1	9	4	0	0	0	27	14	46
Gibbs	1	9	5	0	0	0	27	14	46
Gibbs	1	10	1	0	0	1	60	16	40
Gibbs	1	10	2	0	1	1	60	16	40
Gibbs	1	10	3	0	0	1	60	16	40
Gibbs	1	10	4	0	1	0	60	16	40
Gibbs	1	10	5	0	1	0	60	16	40
Gibbs	1	11	1	0	1	1	5	14	36
Gibbs	1	11	2	0	1	1	5	14	36
Gibbs	1	11	3	0	1	0	5	14	36
Gibbs	1	11	4	0	1	0	5	14	36
Gibbs	1	11	5	0	1	0	5	14	36
Gibbs	1	12	1	0	1	0	10	14	39
Gibbs	1	12	2	0	1	1	10	14	39
Gibbs	1	12	3	0	1	1	10	14	39
Gibbs	1	12	4	0	1	0	10	14	39
Gibbs	1	12	5	0	0	0	10	14	39
Gibbs	1	13	1	0	1	0	10	16	38
Gibbs	1	13	2	0	1	0	10	16	38
Gibbs	1	13	3	0	0	0	10	16	38
Gibbs	1	13	4	0	1	1	10	16	38
Gibbs	1	13	5	0	1	0	10	16	38
Gibbs	1	14	1	0	1	1	18	14	34
Gibbs	1	14	2	0	1	0	18	14	34
Gibbs	1	14	3	0	1	0	18	14	34
Gibbs	1	14	4	0	1	1	18	14	34
Gibbs	1	14	5	0	1	0	18	14	34
Gibbs	1	15	1	0	1	0	20	14	41
Gibbs	1	15	2	0	1	1	20	14	41
Gibbs	1	15	3	0	1	1	20	14	41
Gibbs	1	15	4	0	1	0	20	14	41
Gibbs	1	15	5	0	1	0	20	14	41
Gibbs	1	16	1	0	1	1	75	12	37
Gibbs	1	16	2	0	1	1	75	12	37
Gibbs	1	16	3	0	1	0	75	12	37
Gibbs	1	16	4	0	1	1	75	12	37
Gibbs	1	16	5	0	1	0	75	12	37
Gibbs	1	17	1	0	1	0	40	12	25
Gibbs	1	17	2	0	1	1	40	12	25
Gibbs	1	17	3	0	1	1	40	12	25
Gibbs	1	17	4	0	1	0	40	12	25
Gibbs	1	17	5	0	1	1	40	12	25
Gibbs	2	1	1	0	1	0	22	14	45
Gibbs	2	1	2	0	1	0	22	14	45
Gibbs	2	1	3	1	1	0	22	14	45
Gibbs	2	1	4	0	1	0	22	14	45
Gibbs	2	1	5	0	1	0	22	14	45
Gibbs	2	2	1	0	1	1	12	16	38
Gibbs	2	2	2	0	1	0	12	16	38
Gibbs	2	2	3	0	1	1	12	16	38
Gibbs	2	2	4	0	1	1	12	16	38
Gibbs	2	2	5	0	1	0	12	16	38
Gibbs	2	3	1	0	1	1	25	12	45
Gibbs	2	3	2	0	1	0	25	12	45
Gibbs	2	3	3	0	1	1	25	12	45
Gibbs	2	3	4	0	1	0	25	12	45
Gibbs	2	3	5	0	1	0	25	12	45
Gibbs	2	4	1	0	1	1	12	14	42
Gibbs	2	4	2	0	1	0	12	14	42
Gibbs	2	4	3	0	1	1	12	14	42
Gibbs	2	4	4	0	1	0	12	14	42
Gibbs	2	4	5	0	1	0	12	14	42
Gibbs	2	5	1	0	1	0	15	16	41
Gibbs	2	5	2	0	0	0	15	16	41
Gibbs	2	5	3	0	1	0	15	16	41
Gibbs	2	5	4	0	1	0	15	16	41
Gibbs	2	5	5	0	1	1	15	16	41
Gibbs	2	6	1	0	1	0	12	14	38
Gibbs	2	6	2	0	1	0	12	14	38
Gibbs	2	6	3	0	1	0	12	14	38
Gibbs	2	6	4	0	1	0	12	14	38
Gibbs	2	6	5	0	1	0	12	14	38
Gibbs	2	7	1	0	1	0	6	16	35
Gibbs	2	7	2	0	1	0	6	16	35
Gibbs	2	7	3	0	1	0	6	16	35
Gibbs	2	7	4	0	1	0	6	16	35
Gibbs	2	7	5	0	1	1	6	16	35
Gibbs	2	8	1	0	1	1	8	14	47
Gibbs	2	8	2	0	1	0	8	14	47
Gibbs	2	8	3	0	1	0	8	14	47
Gibbs	2	8	4	0	0	0	8	14	47
Gibbs	2	8	5	0	1	0	8	14	47
Gibbs	2	9	1	0	1	0	8	16	39
Gibbs	2	9	2	0	1	0	8	16	39
Gibbs	2	9	3	0	0	0	8	16	39
Gibbs	2	9	4	0	1	0	8	16	39
Gibbs	2	9	5	0	1	0	8	16	39
Gibbs	2	10	1	0	1	0	9	14	47
Gibbs	2	10	2	0	1	0	9	14	47
Gibbs	2	10	3	0	1	0	9	14	47
Gibbs	2	10	4	0	1	0	9	14	47
Gibbs	2	10	5	0	1	0	9	14	47
Gibbs	2	11	1	0	1	0	0	14	36
Gibbs	2	11	2	0	1	0	0	14	36
Gibbs	2	11	3	0	0	0	0	14	36
Gibbs	2	11	4	0	1	0	0	14	36
Gibbs	2	11	5	0	1	1	0	14	36
Gibbs	2	12	1	0	1	0	28	16	33
Gibbs	2	12	2	0	1	0	28	16	33
Gibbs	2	12	3	0	1	0	28	16	33
Gibbs	2	12	4	0	1	0	28	16	33
Gibbs	2	12	5	0	1	0	28	16	33
Gibbs	2	13	1	0	0	0	39	16	39
Gibbs	2	13	2	0	1	0	39	16	39
Gibbs	2	13	3	0	1	0	39	16	39
Gibbs	2	13	4	0	1	0	39	16	39
Gibbs	2	13	5	0	0	1	39	16	39
Gibbs	2	14	1	0	1	0	32	12	39
Gibbs	2	14	2	0	1	0	32	12	39
Gibbs	2	14	3	0	1	0	32	12	39
Gibbs	2	14	4	0	0	0	32	12	39
Gibbs	2	14	5	0	1	0	32	12	39
Gibbs	2	15	1	0	1	1	12	14	52
Gibbs	2	15	2	0	1	1	12	14	52
Gibbs	2	15	3	0	1	0	12	14	52
Gibbs	2	15	4	0	1	1	12	14	52
Gibbs	2	15	5	0	1	0	12	14	52
Gibbs	2	16	1	0	1	0	62	14	42
Gibbs	2	16	2	0	0	1	62	14	42
Gibbs	2	16	3	0	1	1	62	14	42
Gibbs	2	16	4	0	1	0	62	14	42
Gibbs	2	16	5	0	1	0	62	14	42
Gibbs	2	17	1	0	1	0	98	12	45
Gibbs	2	17	2	0	1	1	98	12	45
Gibbs	2	17	3	0	1	1	98	12	45
Gibbs	2	17	4	0	1	0	98	12	45
Gibbs	2	17	5	0	1	0	98	12	45
Gibbs	3	1	1	0	1	0	43	14	33
Gibbs	3	1	2	0	1	0	43	14	33
Gibbs	3	1	3	0	1	0	43	14	33
Gibbs	3	1	4	0	1	0	43	14	33
Gibbs	3	1	5	0	1	0	43	14	33
Gibbs	3	2	1	0	0	0	41	14	39
Gibbs	3	2	2	0	1	0	41	14	39
Gibbs	3	2	3	0	1	0	41	14	39
Gibbs	3	2	4	0	1	0	41	14	39
Gibbs	3	2	5	0	1	0	41	14	39
Gibbs	3	3	1	0	1	1	0	12	42
Gibbs	3	3	2	0	0	0	0	12	42
Gibbs	3	3	3	0	1	0	0	12	42
Gibbs	3	3	4	0	1	0	0	12	42
Gibbs	3	3	5	0	1	0	0	12	42
Gibbs	3	4	1	0	1	1	0	14	31
Gibbs	3	4	2	0	1	1	0	14	31
Gibbs	3	4	3	0	1	0	0	14	31
Gibbs	3	4	4	0	1	0	0	14	31
Gibbs	3	4	5	0	1	0	0	14	31
Gibbs	3	5	1	0	1	1	0	14	42
Gibbs	3	5	2	0	1	0	0	14	42
Gibbs	3	5	3	0	1	0	0	14	42
Gibbs	3	5	4	0	1	0	0	14	42
Gibbs	3	5	5	0	1	0	0	14	42
Gibbs	3	6	1	0	1	1	7	14	37
Gibbs	3	6	2	0	1	1	7	14	37
Gibbs	3	6	3	0	1	0	7	14	37
Gibbs	3	6	4	0	1	1	7	14	37
Gibbs	3	6	5	0	1	0	7	14	37
Gibbs	3	7	1	0	1	1	17	14	32
Gibbs	3	7	2	0	1	0	17	14	32
Gibbs	3	7	3	0	1	0	17	14	32
Gibbs	3	7	4	0	1	0	17	14	32
Gibbs	3	7	5	0	1	0	17	14	32
Gibbs	3	8	1	0	0	0	25	14	39
Gibbs	3	8	2	0	1	0	25	14	39
Gibbs	3	8	3	0	1	0	25	14	39
Gibbs	3	8	4	0	1	0	25	14	39
Gibbs	3	8	5	0	1	0	25	14	39
Gibbs	3	9	1	0	1	1	0	14	40
Gibbs	3	9	2	0	1	0	0	14	40
Gibbs	3	9	3	0	1	0	0	14	40
Gibbs	3	9	4	0	0	0	0	14	40
Gibbs	3	9	5	0	0	1	0	14	40
Gibbs	3	10	1	0	1	0	31	16	35
Gibbs	3	10	2	0	1	0	31	16	35
Gibbs	3	10	3	0	1	0	31	16	35
Gibbs	3	10	4	0	1	0	31	16	35
Gibbs	3	10	5	0	1	0	31	16	35
Gibbs	3	11	1	0	0	0	6	16	33
Gibbs	3	11	2	0	1	0	6	16	33
Gibbs	3	11	3	0	1	0	6	16	33
Gibbs	3	11	4	0	1	0	6	16	33
Gibbs	3	11	5	0	1	0	6	16	33
Gibbs	3	12	1	0	1	0	16	16	32
Gibbs	3	12	2	0	1	0	16	16	32
Gibbs	3	12	3	0	1	0	16	16	32
Gibbs	3	12	4	0	0	0	16	16	32
Gibbs	3	12	5	0	1	0	16	16	32
Gibbs	3	13	1	0	1	0	17	16	30
Gibbs	3	13	2	0	1	0	17	16	30
Gibbs	3	13	3	0	1	0	17	16	30
Gibbs	3	13	4	0	1	0	17	16	30
Gibbs	3	13	5	0	1	1	17	16	30
Gibbs	3	14	1	0	1	0	20	12	32
Gibbs	3	14	2	0	1	1	20	12	32
Gibbs	3	14	3	0	0	1	20	12	32
Gibbs	3	14	4	0	0	0	20	12	32
Gibbs	3	14	5	0	0	1	20	12	32
Gibbs	3	15	1	0	0	0	22	16	36
Gibbs	3	15	2	0	1	1	22	16	36
Gibbs	3	15	3	0	1	1	22	16	36
Gibbs	3	15	4	0	1	1	22	16	36
Gibbs	3	15	5	0	1	1	22	16	36
Gibbs	3	16	1	0	0	1	61	14	41
Gibbs	3	16	2	0	1	1	61	14	41
Gibbs	3	16	3	0	1	1	61	14	41
Gibbs	3	16	4	0	1	1	61	14	41
Gibbs	3	16	5	0	1	1	61	14	41
Gibbs	3	17	1	1	1	1	110	14	39
Gibbs	3	17	2	1	0	1	110	14	39
Gibbs	3	17	3	3	1	1	110	14	39
Gibbs	3	17	4	0	1	1	110	14	39
Gibbs	3	17	5	3	0	1	110	14	39
Gibbs	4	1	1	0	1	1	90	16	37
Gibbs	4	1	2	0	1	1	90	16	37
Gibbs	4	1	3	0	1	0	90	16	37
Gibbs	4	1	4	0	0	1	90	16	37
Gibbs	4	1	5	0	1	0	90	16	37
Gibbs	4	2	1	0	1	0	0	16	42
Gibbs	4	2	2	0	1	0	0	16	42
Gibbs	4	2	3	0	1	0	0	16	42
Gibbs	4	2	4	0	1	0	0	16	42
Gibbs	4	2	5	0	1	0	0	16	42
Gibbs	4	3	1	0	1	1	47	16	37
Gibbs	4	3	2	0	1	0	47	16	37
Gibbs	4	3	3	0	1	0	47	16	37
Gibbs	4	3	4	0	1	0	47	16	37
Gibbs	4	3	5	0	1	0	47	16	37
Gibbs	4	4	1	0	0	0	8	14	39
Gibbs	4	4	2	0	1	0	8	14	39
Gibbs	4	4	3	0	1	0	8	14	39
Gibbs	4	4	4	0	1	0	8	14	39
Gibbs	4	4	5	0	1	0	8	14	39
Gibbs	4	5	1	0	1	0	26	16	33
Gibbs	4	5	2	0	1	0	26	16	33
Gibbs	4	5	3	0	0	1	26	16	33
Gibbs	4	5	4	0	1	0	26	16	33
Gibbs	4	5	5	0	1	1	26	16	33
Gibbs	4	6	1	0	1	0	8	16	31
Gibbs	4	6	2	0	1	0	8	16	31
Gibbs	4	6	3	0	1	1	8	16	31
Gibbs	4	6	4	0	1	1	8	16	31
Gibbs	4	6	5	0	0	0	8	16	31
Gibbs	4	7	1	0	1	0	71	14	40
Gibbs	4	7	2	0	1	0	71	14	40
Gibbs	4	7	3	0	1	1	71	14	40
Gibbs	4	7	4	2	1	0	71	14	40
Gibbs	4	7	5	0	1	0	71	14	40
Gibbs	4	8	1	0	1	0	0	14	42
Gibbs	4	8	2	0	1	0	0	14	42
Gibbs	4	8	3	0	1	0	0	14	42
Gibbs	4	8	4	0	1	0	0	14	42
Gibbs	4	8	5	0	1	1	0	14	42
Gibbs	4	9	1	0	1	0	52	16	38
Gibbs	4	9	2	0	1	0	52	16	38
Gibbs	4	9	3	0	0	1	52	16	38
Gibbs	4	9	4	0	0	0	52	16	38
Gibbs	4	9	5	0	1	0	52	16	38
Gibbs	4	10	1	0	1	0	30	16	42
Gibbs	4	10	2	0	1	0	30	16	42
Gibbs	4	10	3	0	1	1	30	16	42
Gibbs	4	10	4	0	1	1	30	16	42
Gibbs	4	10	5	0	1	0	30	16	42
Gibbs	4	11	1	0	1	0	12	18	38
Gibbs	4	11	2	0	1	0	12	18	38
Gibbs	4	11	3	0	1	0	12	18	38
Gibbs	4	11	4	0	1	0	12	18	38
Gibbs	4	11	5	0	1	0	12	18	38
Gibbs	4	12	1	0	1	0	0	16	39
Gibbs	4	12	2	0	1	0	0	16	39
Gibbs	4	12	3	0	1	1	0	16	39
Gibbs	4	12	4	0	1	0	0	16	39
Gibbs	4	12	5	0	1	0	0	16	39
Gibbs	4	13	1	0	0	1	10	16	41
Gibbs	4	13	2	0	0	0	10	16	41
Gibbs	4	13	3	0	1	0	10	16	41
Gibbs	4	13	4	0	0	1	10	16	41
Gibbs	4	13	5	0	0	1	10	16	41
Gibbs	4	14	1	0	1	0	42	14	46
Gibbs	4	14	2	0	1	0	42	14	46
Gibbs	4	14	3	0	0	1	42	14	46
Gibbs	4	14	4	0	1	1	42	14	46
Gibbs	4	14	5	0	1	1	42	14	46
Gibbs	4	15	1	0	1	1	20	16	42
Gibbs	4	15	2	0	1	0	20	16	42
Gibbs	4	15	3	0	1	0	20	16	42
Gibbs	4	15	4	0	1	0	20	16	42
Gibbs	4	15	5	0	1	0	20	16	42
Gibbs	4	16	1	2	0	1	0	12	44
Gibbs	4	16	2	1	1	1	0	12	44
Gibbs	4	16	3	0	1	1	0	12	44
Gibbs	4	16	4	2	1	0	0	12	44
Gibbs	4	16	5	0	1	0	0	12	44
Gibbs	4	17	1	0	1	0	150	16	43
Gibbs	4	17	2	0	0	1	150	16	43
Gibbs	4	17	3	2	1	1	150	16	43
Gibbs	4	17	4	1	1	1	150	16	43
Gibbs	4	17	5	0	1	1	150	16	43
Lang	0	1	1	2	0	0	20	16	41
Lang	0	1	2	1	1	1	20	16	41
Lang	0	1	3	0	1	1	20	16	41
Lang	0	1	4	1	0	1	20	16	41
Lang	0	1	5	0	0	0	20	16	41
Lang	0	2	1	0	1	1	32	14	42
Lang	0	2	2	0	0	1	32	14	42
Lang	0	2	3	0	1	0	32	14	42
Lang	0	2	4	0	1	1	32	14	42
Lang	0	2	5	0	1	1	32	14	42
Lang	0	3	1	0	1	1	42	18	33
Lang	0	3	2	4	1	1	42	18	33
Lang	0	3	3	0	1	1	42	18	33
Lang	0	3	4	0	1	1	42	18	33
Lang	0	3	5	0	0	1	42	18	33
Lang	0	4	1	0	0	1	44	14	34
Lang	0	4	2	0	1	1	44	14	34
Lang	0	4	3	0	1	0	44	14	34
Lang	0	4	4	0	1	0	44	14	34
Lang	0	4	5	0	1	0	44	14	34
Lang	0	5	1	0	1	1	40	16	45
Lang	0	5	2	0	1	1	40	16	45
Lang	0	5	3	0	1	1	40	16	45
Lang	0	5	4	0	0	0	40	16	45
Lang	0	5	5	0	0	0	40	16	45
Lang	0	6	1	4	0	0	49	18	37
Lang	0	6	2	0	0	0	49	18	37
Lang	0	6	3	0	0	1	49	18	37
Lang	0	6	4	0	0	1	49	18	37
Lang	0	6	5	0	1	0	49	18	37
Lang	0	7	1	0	1	1	19	16	39
Lang	0	7	2	0	1	0	19	16	39
Lang	0	7	3	0	0	1	19	16	39
Lang	0	7	4	0	1	0	19	16	39
Lang	0	7	5	0	0	1	19	16	39
Lang	0	8	1	0	1	1	12	14	38
Lang	0	8	2	0	1	1	12	14	38
Lang	0	8	3	0	1	1	12	14	38
Lang	0	8	4	0	1	1	12	14	38
Lang	0	8	5	0	1	0	12	14	38
Lang	0	9	1	0	1	0	9	14	36
Lang	0	9	2	0	1	0	9	14	36
Lang	0	9	3	0	1	0	9	14	36
Lang	0	9	4	0	1	0	9	14	36
Lang	0	9	5	0	1	1	9	14	36
Lang	0	10	1	0	0	1	58	16	46
Lang	0	10	2	0	1	0	58	16	46
Lang	0	10	3	3	1	0	58	16	46
Lang	0	10	4	0	1	0	58	16	46
Lang	0	10	5	0	0	0	58	16	46
Lang	0	11	1	4	1	1	95	16	41
Lang	0	11	2	0	1	1	95	16	41
Lang	0	11	3	1	1	1	95	16	41
Lang	0	11	4	3	1	1	95	16	41
Lang	0	11	5	0	1	0	95	16	41
Lang	0	12	1	0	1	1	50	16	45
Lang	0	12	2	0	1	1	50	16	45
Lang	0	12	3	0	1	1	50	16	45
Lang	0	12	4	0	1	1	50	16	45
Lang	0	12	5	0	1	1	50	16	45
Lang	1	1	1	0	0	0	2	14	35
Lang	1	1	2	0	0	0	2	14	35
Lang	1	1	3	0	1	1	2	14	35
Lang	1	1	4	0	1	0	2	14	35
Lang	1	1	5	0	0	1	2	14	35
Lang	1	2	1	0	0	1	0	18	41
Lang	1	2	2	0	1	0	0	18	41
Lang	1	2	3	0	1	0	0	18	41
Lang	1	2	4	0	0	0	0	18	41
Lang	1	2	5	0	1	0	0	18	41
Lang	1	3	1	0	1	1	0	18	41
Lang	1	3	2	0	0	1	0	18	41
Lang	1	3	3	0	1	0	0	18	41
Lang	1	3	4	0	1	1	0	18	41
Lang	1	3	5	0	1	0	0	18	41
Lang	1	4	1	0	1	0	10	16	41
Lang	1	4	2	0	1	0	10	16	41
Lang	1	4	3	0	1	1	10	16	41
Lang	1	4	4	0	1	0	10	16	41
Lang	1	4	5	0	1	1	10	16	41
Lang	1	5	1	0	1	0	0	16	34
Lang	1	5	2	0	1	1	0	16	34
Lang	1	5	3	0	1	0	0	16	34
Lang	1	5	4	0	1	0	0	16	34
Lang	1	5	5	0	0	1	0	16	34
Lang	1	6	1	0	1	0	10	14	37
Lang	1	6	2	0	1	0	10	14	37
Lang	1	6	3	0	1	1	10	14	37
Lang	1	6	4	0	1	1	10	14	37
Lang	1	6	5	0	1	0	10	14	37
Lang	1	7	1	0	0	1	7	12	36
Lang	1	7	2	0	1	0	7	12	36
Lang	1	7	3	0	1	0	7	12	36
Lang	1	7	4	0	1	1	7	12	36
Lang	1	7	5	0	1	1	7	12	36
Lang	1	8	1	0	1	0	11	16	38
Lang	1	8	2	0	0	0	11	16	38
Lang	1	8	3	0	1	0	11	16	38
Lang	1	8	4	0	1	0	11	16	38
Lang	1	8	5	0	1	1	11	16	38
Lang	1	9	1	0	1	0	10	14	35
Lang	1	9	2	0	1	0	10	14	35
Lang	1	9	3	0	1	1	10	14	35
Lang	1	9	4	0	1	0	10	14	35
Lang	1	9	5	3	1	0	10	14	35
Lang	1	10	1	0	1	0	42	14	33
Lang	1	10	2	0	1	0	42	14	33
Lang	1	10	3	0	1	1	42	14	33
Lang	1	10	4	0	1	0	42	14	33
Lang	1	10	5	0	1	0	42	14	33
Lang	1	11	1	0	1	0	4	16	24
Lang	1	11	2	0	1	0	4	16	24
Lang	1	11	3	0	1	1	4	16	24
Lang	1	11	4	0	1	0	4	16	24
Lang	1	11	5	0	1	0	4	16	24
Lang	1	12	1	0	1	0	13	12	39
Lang	1	12	2	2	1	0	13	12	39
Lang	1	12	3	0	0	1	13	12	39
Lang	1	12	4	0	1	0	13	12	39
Lang	1	12	5	0	1	1	13	12	39
Lang	2	1	1	0	0	1	86	16	42
Lang	2	1	2	0	1	0	86	16	42
Lang	2	1	3	0	0	0	86	16	42
Lang	2	1	4	0	1	1	86	16	42
Lang	2	1	5	0	1	1	86	16	42
Lang	2	2	1	0	0	1	3	14	42
Lang	2	2	2	0	0	1	3	14	42
Lang	2	2	3	0	1	0	3	14	42
Lang	2	2	4	0	1	1	3	14	42
Lang	2	2	5	0	1	1	3	14	42
Lang	2	3	1	0	1	1	22	18	45
Lang	2	3	2	0	1	0	22	18	45
Lang	2	3	3	0	1	0	22	18	45
Lang	2	3	4	0	1	0	22	18	45
Lang	2	3	5	0	1	1	22	18	45
Lang	2	4	1	0	1	1	10	16	38
Lang	2	4	2	0	1	1	10	16	38
Lang	2	4	3	0	1	1	10	16	38
Lang	2	4	4	0	1	0	10	16	38
Lang	2	4	5	0	1	0	10	16	38
Lang	2	5	1	0	1	0	5	14	33
Lang	2	5	2	0	0	1	5	14	33
Lang	2	5	3	0	1	1	5	14	33
Lang	2	5	4	0	1	1	5	14	33
Lang	2	5	5	0	1	0	5	14	33
Lang	2	6	1	0	1	0	2	16	35
Lang	2	6	2	0	1	0	2	16	35
Lang	2	6	3	0	1	1	2	16	35
Lang	2	6	4	0	1	0	2	16	35
Lang	2	6	5	0	0	0	2	16	35
Lang	2	7	1	0	0	0	0	14	43
Lang	2	7	2	0	1	0	0	14	43
Lang	2	7	3	0	1	1	0	14	43
Lang	2	7	4	0	1	0	0	14	43
Lang	2	7	5	0	1	0	0	14	43
Lang	2	8	1	0	1	0	15	16	38
Lang	2	8	2	0	1	0	15	16	38
Lang	2	8	3	0	1	0	15	16	38
Lang	2	8	4	0	1	1	15	16	38
Lang	2	8	5	0	1	1	15	16	38
Lang	2	9	1	0	1	1	12	18	41
Lang	2	9	2	0	1	1	12	18	41
Lang	2	9	3	0	1	1	12	18	41
Lang	2	9	4	0	1	1	12	18	41
Lang	2	9	5	0	1	1	12	18	41
Lang	2	10	1	0	0	0	27	14	43
Lang	2	10	2	0	1	1	27	14	43
Lang	2	10	3	0	1	1	27	14	43
Lang	2	10	4	0	1	1	27	14	43
Lang	2	10	5	0	1	0	27	14	43
Lang	2	11	1	0	1	1	2	14	40
Lang	2	11	2	0	1	0	2	14	40
Lang	2	11	3	0	1	1	2	14	40
Lang	2	11	4	0	1	0	2	14	40
Lang	2	11	5	0	1	0	2	14	40
Lang	2	12	1	0	1	0	5	14	31
Lang	2	12	2	0	1	0	5	14	31
Lang	2	12	3	0	1	1	5	14	31
Lang	2	12	4	0	1	1	5	14	31
Lang	2	12	5	0	1	0	5	14	31
Lang	3	1	1	0	1	0	21	14	41
Lang	3	1	2	0	1	0	21	14	41
Lang	3	1	3	0	1	1	21	14	41
Lang	3	1	4	0	1	0	21	14	41
Lang	3	1	5	0	0	1	21	14	41
Lang	3	2	1	0	0	0	28	14	48
Lang	3	2	2	0	0	1	28	14	48
Lang	3	2	3	0	1	0	28	14	48
Lang	3	2	4	0	1	0	28	14	48
Lang	3	2	5	0	0	0	28	14	48
Lang	3	3	1	0	0	0	5	16	39
Lang	3	3	2	0	1	0	5	16	39
Lang	3	3	3	0	0	1	5	16	39
Lang	3	3	4	0	1	0	5	16	39
Lang	3	3	5	0	1	1	5	16	39
Lang	3	4	1	0	1	0	15	16	38
Lang	3	4	2	0	1	1	15	16	38
Lang	3	4	3	0	1	0	15	16	38
Lang	3	4	4	0	1	0	15	16	38
Lang	3	4	5	0	0	1	15	16	38
Lang	3	5	1	0	1	1	12	16	45
Lang	3	5	2	0	1	1	12	16	45
Lang	3	5	3	0	1	0	12	16	45
Lang	3	5	4	0	1	1	12	16	45
Lang	3	5	5	0	1	0	12	16	45
Lang	3	6	1	0	0	1	11	16	43
Lang	3	6	2	0	1	0	11	16	43
Lang	3	6	3	0	1	0	11	16	43
Lang	3	6	4	0	1	0	11	16	43
Lang	3	6	5	0	1	1	11	16	43
Lang	3	7	1	0	1	0	25	16	41
Lang	3	7	2	0	1	0	25	16	41
Lang	3	7	3	0	0	0	25	16	41
Lang	3	7	4	0	1	0	25	16	41
Lang	3	7	5	0	1	0	25	16	41
Lang	3	8	1	0	1	0	13	18	34
Lang	3	8	2	0	1	0	13	18	34
Lang	3	8	3	0	1	0	13	18	34
Lang	3	8	4	0	1	1	13	18	34
Lang	3	8	5	0	1	0	13	18	34
Lang	3	9	1	0	1	1	0	14	41
Lang	3	9	2	0	1	0	0	14	41
Lang	3	9	3	0	1	0	0	14	41
Lang	3	9	4	0	1	0	0	14	41
Lang	3	9	5	0	1	1	0	14	41
Lang	3	10	1	0	1	1	30	14	46
Lang	3	10	2	0	1	1	30	14	46
Lang	3	10	3	0	1	1	30	14	46
Lang	3	10	4	0	1	1	30	14	46
Lang	3	10	5	0	1	1	30	14	46
Lang	3	11	1	0	0	1	2	16	28
Lang	3	11	2	0	0	0	2	16	28
Lang	3	11	3	0	1	0	2	16	28
Lang	3	11	4	0	0	1	2	16	28
Lang	3	11	5	0	1	0	2	16	28
Lang	3	12	1	0	1	0	8	14	27
Lang	3	12	2	0	0	1	8	14	27
Lang	3	12	3	0	1	1	8	14	27
Lang	3	12	4	0	0	1	8	14	27
Lang	3	12	5	0	1	0	8	14	27
Lang	4	1	1	0	0	1	0	16	39
Lang	4	1	2	0	1	0	0	16	39
Lang	4	1	3	0	0	1	0	16	39
Lang	4	1	4	0	0	1	0	16	39
Lang	4	1	5	0	0	1	0	16	39
Lang	4	2	1	0	0	1	10	14	41
Lang	4	2	2	0	1	0	10	14	41
Lang	4	2	3	0	1	0	10	14	41
Lang	4	2	4	0	0	0	10	14	41
Lang	4	2	5	0	0	1	10	14	41
Lang	4	3	1	0	1	0	3	14	45
Lang	4	3	2	0	1	1	3	14	45
Lang	4	3	3	0	1	0	3	14	45
Lang	4	3	4	0	1	1	3	14	45
Lang	4	3	5	0	1	1	3	14	45
Lang	4	4	1	0	1	0	30	16	41
Lang	4	4	2	0	0	0	30	16	41
Lang	4	4	3	0	1	0	30	16	41
Lang	4	4	4	0	0	1	30	16	41
Lang	4	4	5	0	1	1	30	16	41
Lang	4	5	1	0	1	0	19	14	39
Lang	4	5	2	0	1	0	19	14	39
Lang	4	5	3	0	1	0	19	14	39
Lang	4	5	4	0	0	0	19	14	39
Lang	4	5	5	0	1	0	19	14	39
Lang	4	6	1	0	1	1	2	16	30
Lang	4	6	2	0	1	1	2	16	30
Lang	4	6	3	0	1	0	2	16	30
Lang	4	6	4	0	1	0	2	16	30
Lang	4	6	5	0	1	0	2	16	30
Lang	4	7	1	0	1	1	9	16	39
Lang	4	7	2	0	1	0	9	16	39
Lang	4	7	3	0	1	0	9	16	39
Lang	4	7	4	0	0	0	9	16	39
Lang	4	7	5	0	1	1	9	16	39
Lang	4	8	1	0	1	1	1	14	30
Lang	4	8	2	0	1	1	1	14	30
Lang	4	8	3	0	1	1	1	14	30
Lang	4	8	4	0	1	1	1	14	30
Lang	4	8	5	0	1	1	1	14	30
Lang	4	9	1	0	1	0	2	18	37
Lang	4	9	2	0	1	1	2	18	37
Lang	4	9	3	2	0	1	2	18	37
Lang	4	9	4	0	1	0	2	18	37
Lang	4	9	5	0	1	0	2	18	37
Lang	4	10	1	0	0	0	40	16	30
Lang	4	10	2	0	0	0	40	16	30
Lang	4	10	3	0	1	1	40	16	30
Lang	4	10	4	0	0	0	40	16	30
Lang	4	10	5	0	1	0	40	16	30
Lang	4	11	1	0	1	0	20	16	34
Lang	4	11	2	0	1	0	20	16	34
Lang	4	11	3	0	1	0	20	16	34
Lang	4	11	4	0	1	1	20	16	34
Lang	4	11	5	0	0	1	20	16	34
Lang	4	12	1	0	1	0	15	14	38
Lang	4	12	2	0	1	1	15	14	38
Lang	4	12	3	0	1	1	15	14	38
Lang	4	12	4	0	1	1	15	14	38
Lang	4	12	5	0	1	0	15	14	38
Lang	5	1	1	0	0	0	48	16	39
Lang	5	1	2	0	0	0	48	16	39
Lang	5	1	3	7	1	0	48	16	39
Lang	5	1	4	0	1	1	48	16	39
Lang	5	1	5	0	1	0	48	16	39
Lang	5	2	1	0	1	0	20	16	37
Lang	5	2	2	0	0	1	20	16	37
Lang	5	2	3	0	1	0	20	16	37
Lang	5	2	4	0	0	0	20	16	37
Lang	5	2	5	0	1	0	20	16	37
Lang	5	3	1	0	1	1	0	16	39
Lang	5	3	2	0	1	0	0	16	39
Lang	5	3	3	0	1	0	0	16	39
Lang	5	3	4	0	1	1	0	16	39
Lang	5	3	5	0	1	0	0	16	39
Lang	5	4	1	0	1	1	10	16	36
Lang	5	4	2	0	1	1	10	16	36
Lang	5	4	3	0	1	0	10	16	36
Lang	5	4	4	0	1	0	10	16	36
Lang	5	4	5	0	1	0	10	16	36
Lang	5	5	1	0	1	0	6	16	35
Lang	5	5	2	0	1	0	6	16	35
Lang	5	5	3	0	0	1	6	16	35
Lang	5	5	4	0	1	0	6	16	35
Lang	5	5	5	0	1	0	6	16	35
Lang	5	6	1	0	0	1	14	14	43
Lang	5	6	2	0	0	0	14	14	43
Lang	5	6	3	0	1	0	14	14	43
Lang	5	6	4	0	1	0	14	14	43
Lang	5	6	5	0	0	1	14	14	43
Lang	5	7	1	0	1	0	5	14	41
Lang	5	7	2	0	1	1	5	14	41
Lang	5	7	3	0	1	0	5	14	41
Lang	5	7	4	0	1	0	5	14	41
Lang	5	7	5	0	1	1	5	14	41
Lang	5	8	1	0	1	1	20	16	37
Lang	5	8	2	0	1	1	20	16	37
Lang	5	8	3	0	1	0	20	16	37
Lang	5	8	4	0	0	1	20	16	37
Lang	5	8	5	0	0	0	20	16	37
Lang	5	9	1	0	1	1	10	14	41
Lang	5	9	2	0	1	0	10	14	41
Lang	5	9	3	0	1	0	10	14	41
Lang	5	9	4	0	1	1	10	14	41
Lang	5	9	5	0	1	0	10	14	41
Lang	5	10	1	0	0	0	35	14	36
Lang	5	10	2	0	1	0	35	14	36
Lang	5	10	3	0	1	0	35	14	36
Lang	5	10	4	0	0	1	35	14	36
Lang	5	10	5	0	1	1	35	14	36
Lang	5	11	1	0	1	1	35	18	39
Lang	5	11	2	0	1	0	35	18	39
Lang	5	11	3	0	1	1	35	18	39
Lang	5	11	4	0	1	1	35	18	39
Lang	5	11	5	0	1	0	35	18	39
Lang	5	12	1	0	1	0	15	14	36
Lang	5	12	2	0	1	0	15	14	36
Lang	5	12	3	0	1	0	15	14	36
Lang	5	12	4	0	1	1	15	14	36
Lang	5	12	5	0	1	0	15	14	36
Lang	6	1	1	0	1	0	80	14	46
Lang	6	1	2	0	1	0	80	14	46
Lang	6	1	3	0	0	1	80	14	46
Lang	6	1	4	0	1	0	80	14	46
Lang	6	1	5	0	1	1	80	14	46
Lang	6	2	1	1	1	1	270	16	39
Lang	6	2	2	0	1	0	270	16	39
Lang	6	2	3	0	1	0	270	16	39
Lang	6	2	4	1	1	0	270	16	39
Lang	6	2	5	0	0	0	270	16	39
Lang	6	3	1	0	1	1	30	14	39
Lang	6	3	2	0	1	1	30	14	39
Lang	6	3	3	0	1	0	30	14	39
Lang	6	3	4	0	1	0	30	14	39
Lang	6	3	5	0	1	1	30	14	39
Lang	6	4	1	3	1	1	32	16	38
Lang	6	4	2	0	1	1	32	16	38
Lang	6	4	3	1	1	0	32	16	38
Lang	6	4	4	5	1	0	32	16	38
Lang	6	4	5	6	1	1	32	16	38
Lang	6	5	1	20	0	1	36	16	32
Lang	6	5	2	8	0	1	36	16	32
Lang	6	5	3	13	0	0	36	16	32
Lang	6	5	4	3	1	1	36	16	32
Lang	6	5	5	1	1	0	36	16	32
Lang	6	6	1	0	1	0	150	14	41
Lang	6	6	2	0	1	0	150	14	41
Lang	6	6	3	0	0	1	150	14	41
Lang	6	6	4	0	1	1	150	14	41
Lang	6	6	5	0	1	1	150	14	41
Lang	6	7	1	0	1	0	15	12	41
Lang	6	7	2	0	0	0	15	12	41
Lang	6	7	3	0	1	0	15	12	41
Lang	6	7	4	0	1	0	15	12	41
Lang	6	7	5	0	1	0	15	12	41
Lang	6	8	1	0	1	1	4	16	35
Lang	6	8	2	2	1	1	4	16	35
Lang	6	8	3	0	1	1	4	16	35
Lang	6	8	4	0	1	1	4	16	35
Lang	6	8	5	0	0	1	4	16	35
Lang	6	9	1	0	1	0	4	14	42
Lang	6	9	2	0	1	0	4	14	42
Lang	6	9	3	0	0	1	4	14	42
Lang	6	9	4	0	1	0	4	14	42
Lang	6	9	5	0	1	0	4	14	42
Lang	6	10	1	0	1	0	14	12	25
Lang	6	10	2	0	1	0	14	12	25
Lang	6	10	3	0	1	1	14	12	25
Lang	6	10	4	0	0	1	14	12	25
Lang	6	10	5	0	1	1	14	12	25
Lang	6	11	1	0	0	1	76	16	35
Lang	6	11	2	0	1	0	76	16	35
Lang	6	11	3	0	1	0	76	16	35
Lang	6	11	4	0	1	1	76	16	35
Lang	6	11	5	0	1	1	76	16	35
Lang	6	12	1	0	1	0	12	16	19
Lang	6	12	2	0	0	1	12	16	19
Lang	6	12	3	0	0	1	12	16	19
Lang	6	12	4	0	0	0	12	16	19
Lang	6	12	5	0	1	1	12	16	19

## Sheet: 2007-aflatoxin
Field	row	point	aflatoxin
Belflower	0	1	54
Belflower	0	2	17
Belflower	0	3	7
Belflower	0	4	7
Belflower	0	5	7
Belflower	0	6	31
Belflower	0	7	60
Belflower	0	8	63
Belflower	0	9	12
Belflower	0	10	230
Belflower	0	11	12
Belflower	0	12	7
Belflower	0	13	29
Belflower	1	1	7
Belflower	1	2	5
Belflower	1	3	8
Belflower	1	4	3
Belflower	1	5	6
Belflower	1	6	4
Belflower	1	7	3
Belflower	1	8	3
Belflower	1	9	9
Belflower	1	10	8
Belflower	1	11	5
Belflower	1	12	5
Belflower	1	13	230
Belflower	2	1	6
Belflower	2	2	2
Belflower	2	3	5
Belflower	2	4	4
Belflower	2	5	5
Belflower	2	6	6
Belflower	2	7	11
Belflower	2	8	8
Belflower	2	9	8
Belflower	2	10	6
Belflower	2	11	8
Belflower	2	12	7
Belflower	2	13	12
Belflower	3	1	4
Belflower	3	2	9
Belflower	3	3	7
Belflower	3	4	17
Belflower	3	5	3
Belflower	3	6	3
Belflower	3	7	7
Belflower	3	8	9
Belflower	3	9	6
Belflower	3	10	6
Belflower	3	11	7
Belflower	3	12	15
Belflower	3	13	4
Belflower	4	1	10
Belflower	4	2	5
Belflower	4	3	8
Belflower	4	4	6
Belflower	4	5	10
Belflower	4	6	6
Belflower	4	7	7
Belflower	4	8	4
Belflower	4	9	4
Belflower	4	10	8
Belflower	4	11	8
Belflower	4	12	11
Belflower	4	13	4
Belflower	5	1	15
Belflower	5	2	14
Belflower	5	3	8
Belflower	5	4	5
Belflower	5	5	5
Belflower	5	6	3
Belflower	5	7	4
Belflower	5	8	9
Belflower	5	9	3
Belflower	5	10	4
Belflower	5	11	8
Belflower	5	12	5
Belflower	5	13	12
Belflower	6	1	7
Belflower	6	2	7
Belflower	6	3	3
Belflower	6	4	7
Belflower	6	5	6
Belflower	6	6	7
Belflower	6	7	10
Belflower	6	8	5
Belflower	6	9	4
Belflower	6	10	26
Belflower	6	11	9
Belflower	6	12	9
Belflower	6	13	5
Gibbs	0	1	5
Gibbs	0	2	60
Gibbs	0	3	9
Gibbs	0	4	9
Gibbs	0	5	29
Gibbs	0	6	4
Gibbs	0	7	11
Gibbs	0	8	65
Gibbs	0	9	7
Gibbs	0	10	22
Gibbs	0	11	3
Gibbs	0	12	20
Gibbs	0	13	3
Gibbs	0	14	30
Gibbs	0	15	8
Gibbs	0	16	9
Gibbs	0	17	10
Gibbs	1	1	8
Gibbs	1	2	40
Gibbs	1	3	6
Gibbs	1	4	6
Gibbs	1	5	5
Gibbs	1	6	4
Gibbs	1	7	7
Gibbs	1	8	9
Gibbs	1	9	13
Gibbs	1	10	6
Gibbs	1	11	4
Gibbs	1	12	11
Gibbs	1	13	12
Gibbs	1	14	9
Gibbs	1	15	20
Gibbs	1	16	4
Gibbs	1	17	32
Gibbs	2	1	10
Gibbs	2	2	7
Gibbs	2	3	8
Gibbs	2	4	4
Gibbs	2	5	20
Gibbs	2	6	9
Gibbs	2	7	6
Gibbs	2	8	10
Gibbs	2	9	6
Gibbs	2	10	6
Gibbs	2	11	9
Gibbs	2	12	7
Gibbs	2	13	4
Gibbs	2	14	6
Gibbs	2	15	8
Gibbs	2	16	38
Gibbs	2	17	37
Gibbs	3	1	140
Gibbs	3	2	10
Gibbs	3	3	5
Gibbs	3	4	22
Gibbs	3	5	5
Gibbs	3	6	9
Gibbs	3	7	26
Gibbs	3	8	9
Gibbs	3	9	11
Gibbs	3	10	5
Gibbs	3	11	4
Gibbs	3	12	5
Gibbs	3	13	7
Gibbs	3	14	28
Gibbs	3	15	5
Gibbs	3	16	36
Gibbs	3	17	30
Gibbs	4	1	5
Gibbs	4	2	4
Gibbs	4	3	7
Gibbs	4	4	4
Gibbs	4	5	14
Gibbs	4	6	11
Gibbs	4	7	6
Gibbs	4	8	8
Gibbs	4	9	7
Gibbs	4	10	21
Gibbs	4	11	4
Gibbs	4	12	5
Gibbs	4	13	4
Gibbs	4	14	4
Gibbs	4	15	5
Gibbs	4	16	7
Gibbs	4	17	7
Lang	0	1	8
Lang	0	2	7
Lang	0	3	10
Lang	0	4	11
Lang	0	5	32
Lang	0	6	22
Lang	0	7	80
Lang	0	8	4
Lang	0	9	120
Lang	0	10	7
Lang	0	11	100
Lang	0	12	4
Lang	1	1	4
Lang	1	2	7
Lang	1	3	5
Lang	1	4	4
Lang	1	5	4
Lang	1	6	9
Lang	1	7	17
Lang	1	8	10
Lang	1	9	13
Lang	1	10	5
Lang	1	11	24
Lang	1	12	8
Lang	2	1	7
Lang	2	2	4
Lang	2	3	11
Lang	2	4	6
Lang	2	5	5
Lang	2	6	6
Lang	2	7	7
Lang	2	8	6
Lang	2	9	5
Lang	2	10	17
Lang	2	11	18
Lang	2	12	5
Lang	3	1	7
Lang	3	2	5
Lang	3	3	7
Lang	3	4	6
Lang	3	5	7
Lang	3	6	9
Lang	3	7	4
Lang	3	8	7
Lang	3	9	6
Lang	3	10	30
Lang	3	11	7
Lang	3	12	140
Lang	4	1	20
Lang	4	2	8
Lang	4	3	4
Lang	4	4	8
Lang	4	5	6
Lang	4	6	5
Lang	4	7	9
Lang	4	8	16
Lang	4	9	7
Lang	4	10	5
Lang	4	11	7
Lang	4	12	5
Lang	5	1	7
Lang	5	2	10
Lang	5	3	5
Lang	5	4	4
Lang	5	5	9
Lang	5	6	4
Lang	5	7	5
Lang	5	8	7
Lang	5	9	76
Lang	5	10	9
Lang	5	11	200
Lang	5	12	5
Lang	6	1	12
Lang	6	2	6
Lang	6	3	5
Lang	6	4	610
Lang	6	5	23
Lang	6	6	160
Lang	6	7	5
Lang	6	8	5
Lang	6	9	7
Lang	6	10	28
Lang	6	11	74
Lang	6	12	130
